# Supplementary material for: High-level reverse intersystem crossing of charge transfer compounds: to fluoresce or not to fluoresce?
Source: Royal Society of Chemistry journal article supplement (doi:10.1039/d4cp01596g), 2024-01-01
Supplement: d4cp01596g1.pdf [file d4cp01596g1.pdf]

## Supporting Information

# High-Level Reverse Intersystem Crossing of Charge Transfer Compounds: Fluoresce or Not to Fluoresce?

Ziqi Deng <sup>b</sup>, Guanheng Huang <sup>b</sup>, Jiayu Li <sup>a</sup>, Junhong Pang <sup>a</sup>, Jiaxing He <sup>b</sup>, David Lee Phillips, <sup>b,\*</sup> Ming-De Li <sup>a,\*</sup>

<sup>a</sup> College of Chemistry and Chemical Engineering, Key (Guangdong-Hong Kong Joint) Laboratory for Preparation and Application of Ordered Structural Materials of Guangdong Province, Shantou University, Guangdong 515063, P. R. China.

<sup>b</sup> Department of Chemistry, The University of Hong Kong, Pokfulam, Hong Kong, China.

## Content

|    |                                                          |    |
|----|----------------------------------------------------------|----|
| A. | EXPERIMENTAL METHODS .....                               | 2  |
| B. | SINGLE CRYSTAL STRUCTURE .....                           | 6  |
| C. | STEADY-STATE UV-VIS ABSORPTION SPECTRA.....              | 8  |
| D. | PHOTOLUMINESCENCE SPECTRA AND KINETICS .....             | 9  |
| E. | FS/NS-TA SPECTRA AND KINETIC .....                       | 11 |
| F. | DFT CALCULATIONS AND TD-DFT CALCULATIONS .....           | 15 |
| G. | <sup>1</sup> H NMR AND <sup>13</sup> C NMR SPECTRA ..... | 20 |
| H. | XYZ COORDINATE.....                                      | 23 |

## A. Experimental methods

### 1. Synthesis method

General: All the compounds and solvents were purchased from commercial resources and were used without further purification. The synthesis of *o*, *m*, *p*-TPA-BP was based on the Suzuki- Miyaura cross-coupling reaction.  $^1\text{H}$  nuclear magnetic resonance ( $^1\text{H}$  NMR) and  $^{13}\text{C}$  nuclear magnetic resonance ( $^{13}\text{C}$  NMR) spectra were recorded in  $\text{CDCl}_3$  by using an AV-400MHz Ultra Shield NMR (Bruker Biospin, Germany) at 400 MHz for  $^1\text{H}$  NMR and 101 Hz for  $^{13}\text{C}$  NMR. The high-resolution mass spectrometry (HRMS) was carried out by Autoflex speed MALDI TOF/TOF mass spectrometer (Bruker Biospin, Germany).

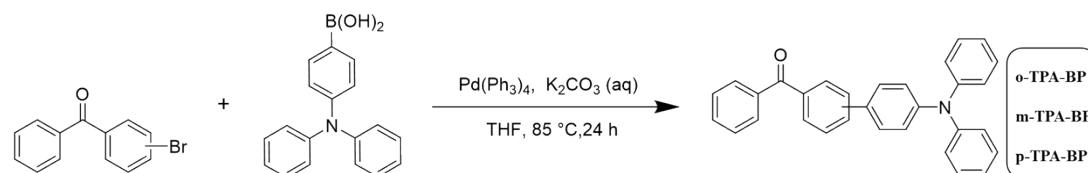

**Scheme S1.** The general synthesis method of *o*, *m*, *p*-TPA-BP.

#### 2-[4-(Diphenylamino)phenyl]benzophenone (*o*-TPA-BP):

In a 50 ml sealed tube, 347 mg (1.2 mmol) of 4-(diphenylamine)phenylboronic acid, 261 mg (1.0 mmol) of *o*-bromobenzophenone was dissolved in 10 ml THF, followed by 1 ml of saturated  $\text{K}_2\text{CO}_3$  aqueous solution. After stirring 24 hours under the  $\text{N}_2$ , the product was extracted by 5 ml dichloromethane three times, and then the organic layer was washed by 5 ml saturated  $\text{NH}_4\text{Cl}$  three times. The crude product was further purified by silica column chromatography after evaporation. The pale yellow solid was obtained in 57.2% yield.  $^1\text{H}$  NMR (400 MHz, Chloroform-*d*)  $\delta$  7.62 – 7.55 (m, 2H), 7.51 – 7.43 (m, 2H), 7.29 (d,  $J = 7.6$  Hz, 1H), 7.20 (t,  $J = 7.8$  Hz, 2H), 7.09 (d,  $J = 6.3$  Hz, 1H), 6.98 (t,  $J = 7.4$  Hz, 1H), 6.87 (dd,  $J = 11.2, 8.2$  Hz, 3H).  $^{13}\text{C}$  NMR (101 MHz, Chloroform-*d*)  $\delta$  199.27, 147.52, 147.19, 140.82, 138.85, 137.73, 134.50, 132.39, 130.63, 130.05, 129.84, 129.43, 129.20, 129.14, 127.92, 127.07, 124.02, 123.97, 122.75. HRMS(MALDI-TOF-MS):  $m/z$  425.23 ( $\text{M}^+$ , calcd. 425.18).

#### 3-[4-(Diphenylamino)phenyl]benzophenone (*m*-TPA-BP):

In a 50 ml sealed tube, 347 mg (1.2 mmol) of 4-(diphenylamine)phenylboronic acid, 261 mg (1.0 mmol) of *m*-bromobenzophenone was dissolved in 10 ml THF, followed by 1 ml of saturated  $\text{K}_2\text{CO}_3$  aqueous solution. After stirring 24 hours under the  $\text{N}_2$ , the product was extracted by 5 ml dichloromethane three times, and then the organic layer was washed by 5 ml saturated  $\text{NH}_4\text{Cl}$  three times. The crude product was further purified by silica column chromatography after evaporation. The white solid was obtained in 68.9% yield.  $^1\text{H}$  NMR (400 MHz, Chloroform-*d*)  $\delta$  8.03 (t,  $J = 1.7$  Hz, 1H),

7.89 – 7.85 (m, 2H), 7.77 (ddt,  $J = 25.2, 7.7, 1.4$  Hz, 2H), 7.65 – 7.59 (m, 1H), 7.57 – 7.52 (m, 2H), 7.52 – 7.48 (m, 3H), 7.29 (dd,  $J = 8.5, 7.2$  Hz, 4H), 7.18 – 7.13 (m, 6H), 7.06 (td,  $J = 7.3, 1.2$  Hz, 2H).  $^{13}\text{C}$  NMR (101 MHz, Chloroform-*d*)  $\delta$  196.85, 147.74, 147.56, 140.90, 138.18, 137.67, 133.78, 132.56, 130.56, 130.16, 129.40, 128.78, 128.48, 128.39, 128.16, 127.90, 124.64, 123.67, 123.21. HRMS(MALDI-TOF-MS):  $m/z$  425.33 ( $\text{M}^+$ , calcd. 425.18).

#### 4-[4-(Diphenylamino)phenyl]benzophenone (*p*-TPA-BP):

In a 50 ml sealed tube, 347 mg (1.2 mmol) of 4-(diphenylamine)phenylboronic acid, 261 mg (1.0 mmol) of *p*-bromobenzophenone was dissolved in 10 ml THF, followed by 1 ml of saturated  $\text{K}_2\text{CO}_3$  aqueous solution. After stirring 24 hours under the  $\text{N}_2$ , the product was extracted by 5 ml dichloromethane three times, and then the organic layer was washed by 5 ml saturated  $\text{NH}_4\text{Cl}$  three times. The crude product was further purified by silica column chromatography after evaporation. Pale yellow solid was obtained in 81.6% yield.  $^1\text{H}$  NMR (400 MHz, Chloroform-*d*)  $\delta$  7.91 – 7.85 (m, 1H), 7.85 – 7.80 (m, 1H), 7.70 – 7.65 (m, 1H), 7.63 – 7.57 (m, 1H), 7.56 – 7.47 (m, 2H), 7.32 – 7.27 (m, 2H), 7.18 – 7.13 (m, 3H), 7.09 – 7.04 (m, 1H).  $^{13}\text{C}$  NMR (101 MHz, Chloroform-*d*)  $\delta$  196.35, 148.14, 147.44, 144.73, 137.90, 135.61, 133.25, 132.29, 130.85, 129.98, 129.39, 128.30, 127.96, 126.27, 124.79, 123.35, 123.33. HRMS(MALDI-TOF-MS):  $m/z$  425.28 ( $\text{M}^+$ , calcd. 425.18).

#### 2. Steady-state UV-vis spectroscopy

Three molecules were prepared into  $10^{-5}$  M solution of cyclohexane (C-hexane), dichloromethane (DCM), ethyl acetate (EA), Dimethylformamide (DMF), and acetonitrile (ACN). The UV-vis spectra of each sample were recorded by UV-1780 UV-vis spectrophotometer (Shimadzu, Japan).

#### 3. Steady-state photoluminescence spectroscopy

Three molecules were prepared into  $10^{-4}$  M solution of C-hexane, DCM, EA, DMF, and ACN, or doped PMMA film. The photoluminescence spectra were measured by Cary Eclipse fluorescence spectrometer (Agilent, USA). The temperature-dependent photoluminescence spectrum of the doped film was measured by FLS1000 Steady State & Time-resolved Photoluminescence Spectrometer (Edinburgh, UK).

#### 4. Transient decay spectroscopy

The transient decay spectra of the  $10^{-4}$  M solution and doped PMMA film of three molecules were measured by FLS1000 Steady State & Time-resolved Photoluminescence Spectrometer (Edinburgh, UK).

#### 5. Phosphorescence spectroscopy

The phosphorescence spectra of the doped PMMA film of *p*-TPA-BP were measured by LP920 transient absorption/emission spectrometer (Edinburgh, UK) with a 355 nm pump beam obtained from the third harmonic output of an Nd:YAG laser. The Phosphorescence spectrum was measured with a delayed gate.

## 6. Fs-TA spectroscopy

The fs-TA measurement system is constituted from a femtosecond regenerative amplified Ti:sapphire laser system (Coherent, Astrella-Tunable-F-1k) and the fs-TA spectrometer system (Ultrafast Systems, Helios Fire). With the 1-kHz repetition frequency and the 84-fs pulse width at 800 nm, the amplifier has an output power of 7.4 W. The white-light continuum probe pulse was generated a (320-700 nm) in a CaF<sub>2</sub> plate, using approximately 4% from the output of the amplifier. The probe beam was subsequently split into two beams by spectroscopy. One probe beam directly passed through the sample, while the other acted as the reference, and was sent directly to the reference detector so that monitored the fluctuations of the probe beam. The instrument response function (IRF) value for the fs-TA system was 120 fs. At each point of the temporal delay, data were collected after averaging for 2 s. and the maximum delay was 8 ns. In this study, the 10<sup>-5</sup> M solution for three molecules was excited by a 300 nm pump beam. All the sample solutions were tested in a 2 mm path-length cuvette. The spectrometric data were recorded in 3D wavelength-time-absorbance matrices, and the chirp correction was done for all the data before analysis.

The principal components were ensured by singular value decomposition (SVD), and then the global fitting was carried out with the selected principal components and exponential function using the sequential kinetics scheme based on the fs-TA spectra by *Glotaran 1.5.1*.

## 7. Ns-TA spectroscopy

The ns-TA measurement is based on the pump-probe ns-TA spectrometer system (Ultrafast System, EOS). The pump beam is generated from the femtosecond regenerative amplified Ti:sapphire laser system with a similar configuration to fs-TA measurement, while the probe beam is generated from a photonic crystal fiber-based sub-nanosecond pulsed probe light source. In this study, the 10<sup>-5</sup> M solution for three molecules was excited by a 300 nm pump beam. All the sample solutions were tested in a 2 mm path-length cuvette. The spectrometric data were recorded in a 3D wavelength-time-absorbance matrix.

The single-wavelength kinetic was extracted from the recorded 3D matrices, and fitting was done by the *Surface Explorer V4.0* based on equation (1).

$$S(t) = e^{-\left(\frac{t-t_0}{\tau_p}\right)} \times \sum_i A_i e^{-\left(\frac{t-t_0}{\tau_p}\right)} \quad (1)$$

## 8. DFT & TD-DFT calculation

The optimization of minimal-energy geometries for three molecules in  $S_0$ , LE, and CT states and the potential energy surface (PES) scanning were by *Gaussian 16* package based on M062X/6-311G(d,p) level. The PES scanning was conducted by calculating the energy of the geometry with fixing dihedral of the highlight two phenyl rings (Fig. 3) in different states, and the oscillator strength was calculated based on each fixed structure. The relative energy level of singlet state and triplet state, and the spin-orbital coupling matrix element (SOCME) based on the minimal-energy geometries for three molecules in LE state or CT state were calculated by *ORCA 5.0.3* on the level of M062X /6-311G(d,p). The electron-hole distribution was calculated by *Multifwn 3.8*, and the depiction was conducted by *VMD*.

## B. Single Crystal Structure

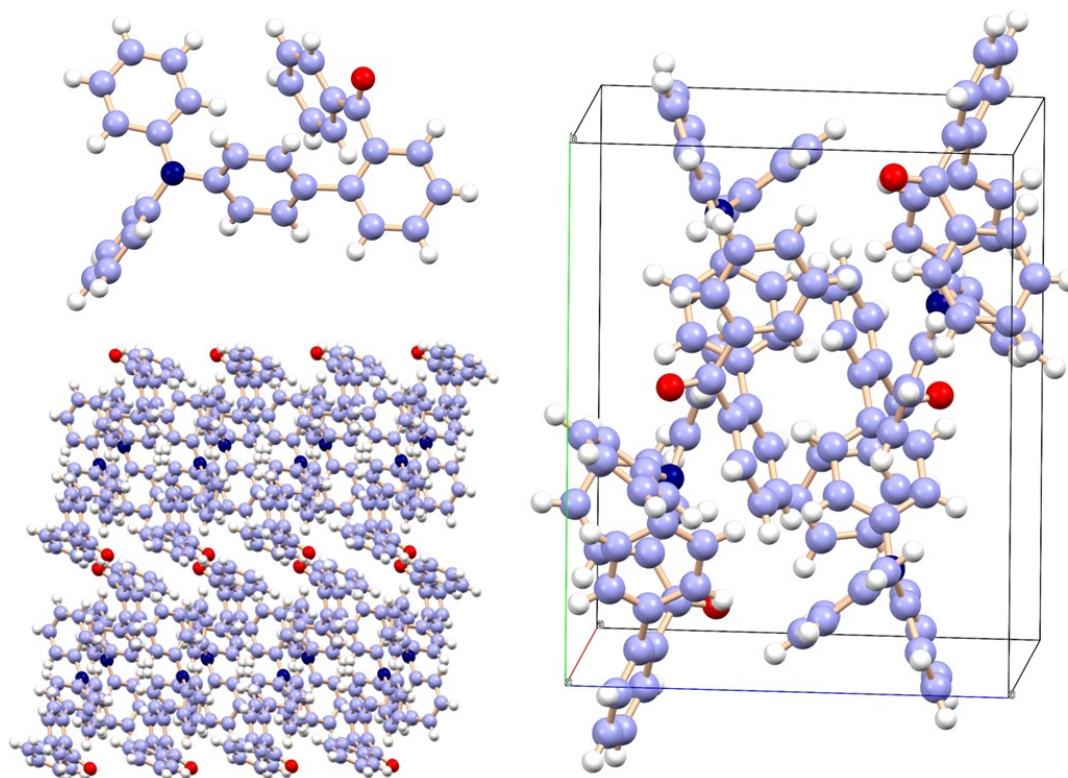

**Fig. S1.** Single-crystal structure of *o*-TPA-BP

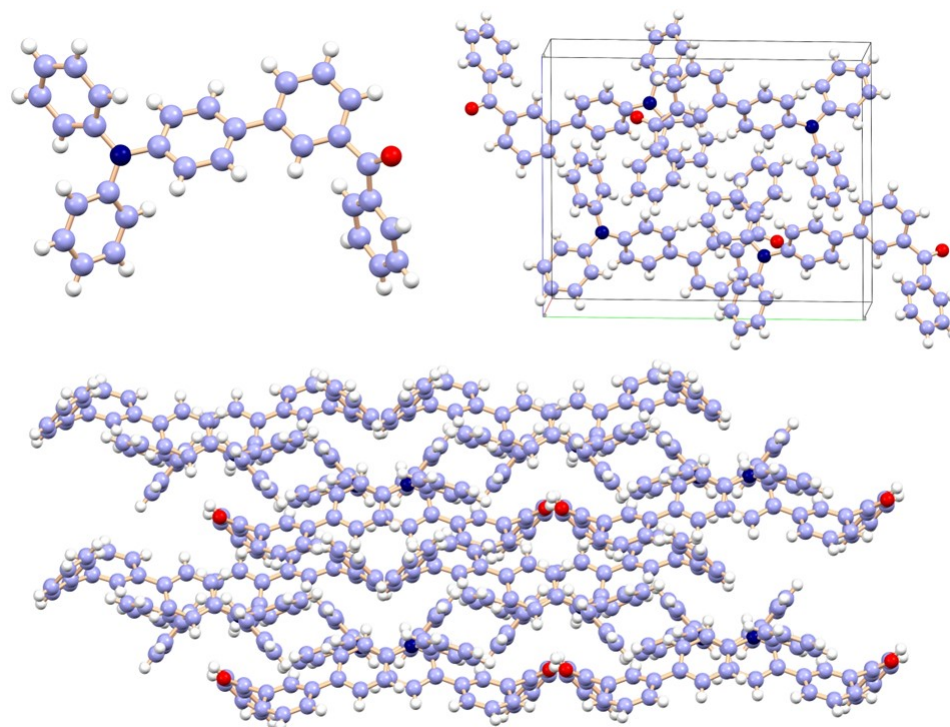

**Fig. S2.** Single-crystal structure of *m*-TPA-BP

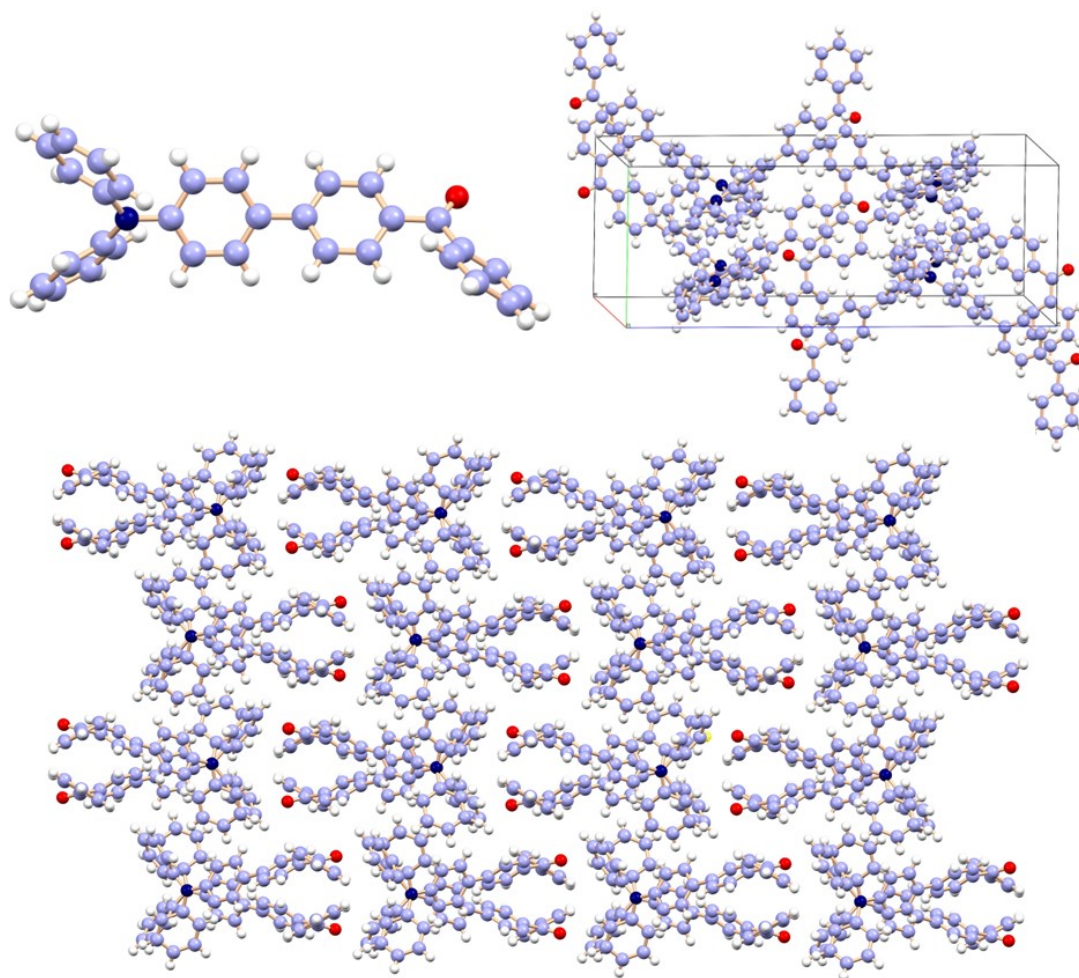

**Fig. S3.** Single-crystal structure of *p*-TPA-BP

### C. Steady-state UV-vis absorption spectra

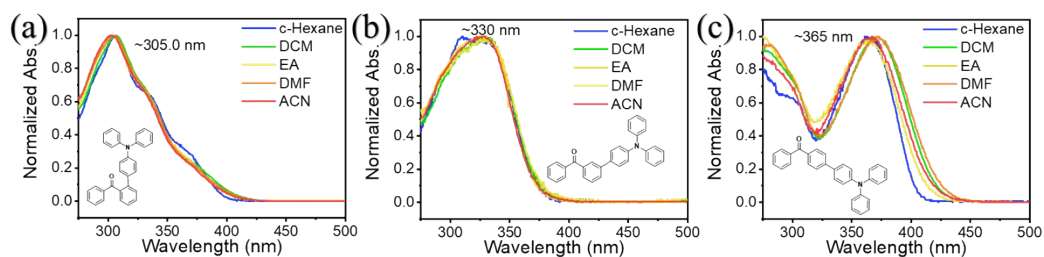

**Fig. S4.** Steady-state UV-vis absorption spectra of (a)*o*-TPA-BP, (b)*m*-TPA-BP, and (c)*p*-TPA-BP measured in different solvents.



## D. Photoluminescence spectra and kinetics

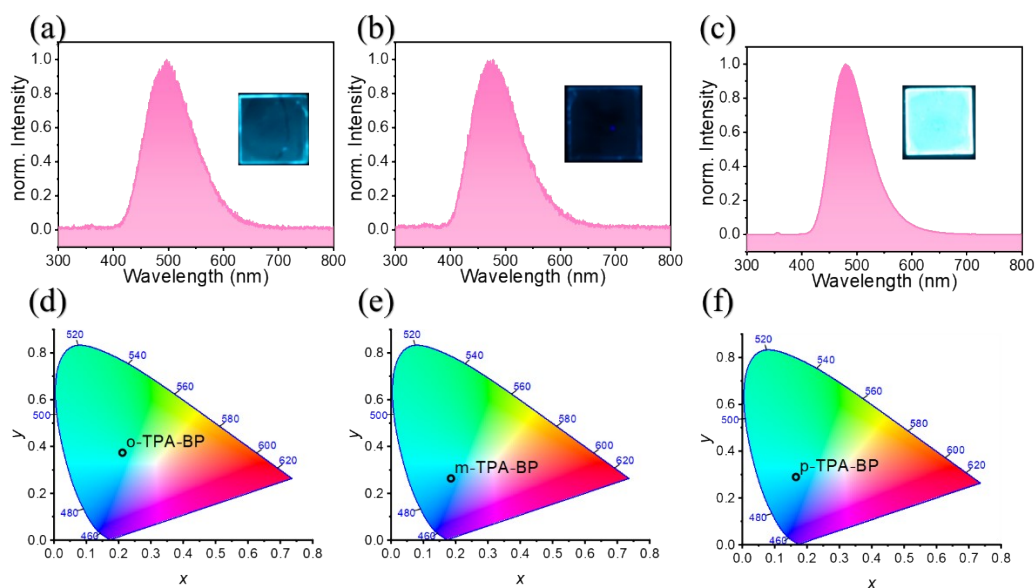

**Fig. S5.** Steady-state PL spectra of the film state (a) *o*-TPA-BP ( $\Phi=0.11$ ), (b) *m*-TPA-BP ( $\Phi=0.02$ ), and (c) *p*-TPA-BP ( $\Phi=0.42$ ) with 355-nm excitation; CIE 1931 color space of the film state (d) *o*-TPA-BP, (e) *m*-TPA-BP, and (f) *p*-TPA-BP.

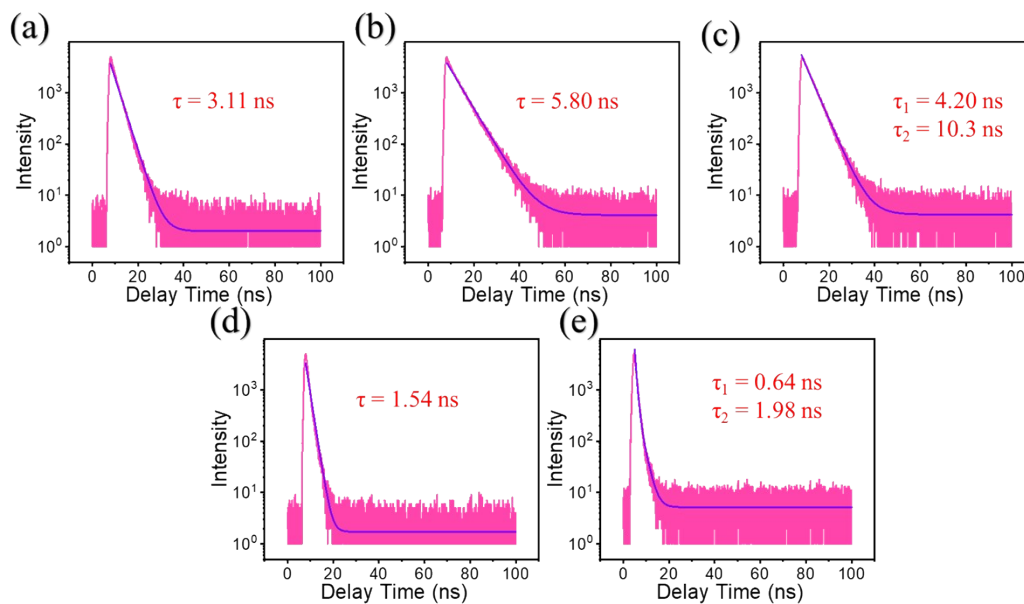

**Fig. S6** Kinetic fitting for the transient PL decay curve of the for (a) *o*-TPA-BP ( $\tau = 3.11$  ns), (b) *m*-TPA-BP ( $\tau = 5.80$  ns), and (c) *p*-TPA-BP ( $\tau_1 = 4.20$  ns,  $\tau_2 = 10.3$  ns) measured in DCM. (a) *p*-TPA-BP measured in cyclohexane ( $\tau = 1.54$  ns), and (b) *p*-TPA-BP measured in ACN ( $\tau_1 = 0.64$  ns,  $\tau_2 = 1.98$  ns)

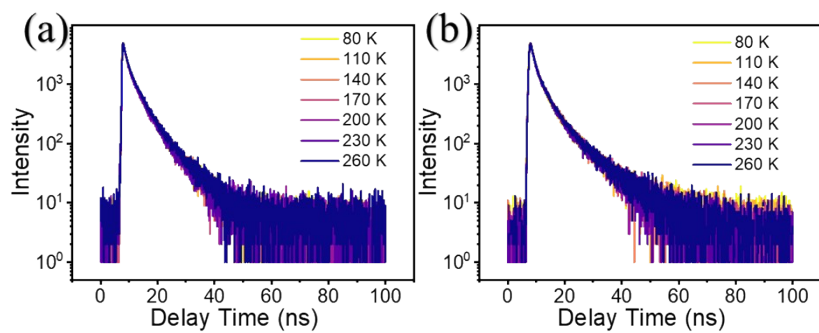

**Fig. S7.** The photoluminescence decay curves of (a) *o*-TPA-BP and (b) *m*-TPA-BP in different temperatures from 80 K to 260 K at the wavelength of intensity maxima.

## E. Fs/ns-TA spectra and kinetic

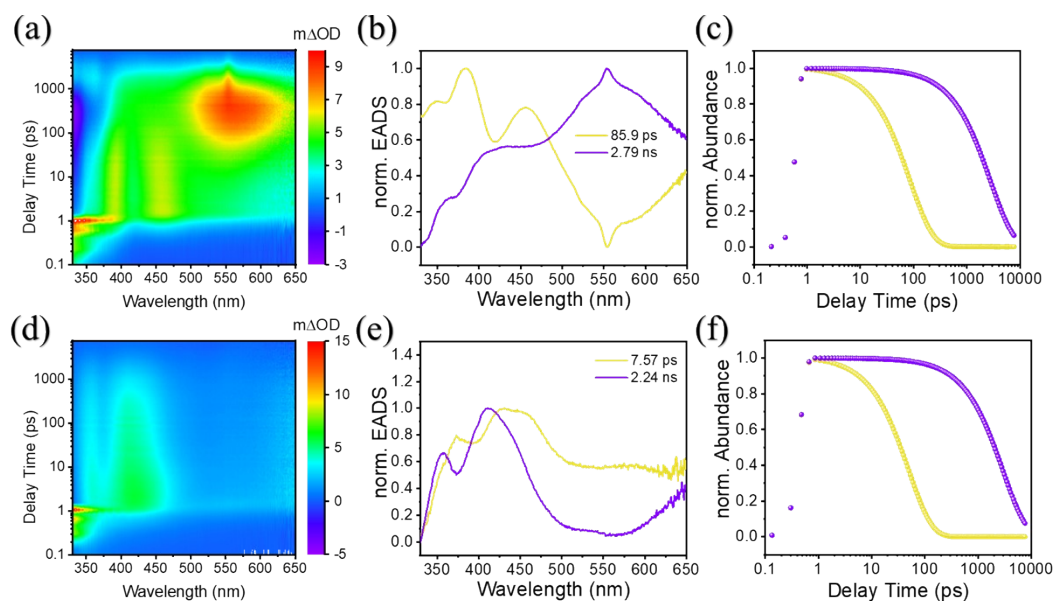

**Fig. S8.** (a) Fs-TA spectra, (b) normalized EADS obtained from global analysis ( $\text{RMS}=3.7\times 10^{-4}$ ), and (c) time evolution of the state population (the color of the fitting trace is consistent with the EADS spectra represented in Fig. S8b) of the *o*-TPA-BP measured in cyclohexane; (d)Fs-TA spectra, (e) normalized EADS obtained from global analysis ( $\text{RMS}=2.2\times 10^{-4}$ ), and (f) time evolution of the state population (the color of the fitting trace is consistent with the EADS spectra represented in Fig. S8e) of the *o*-TPA-BP measured in DCM.

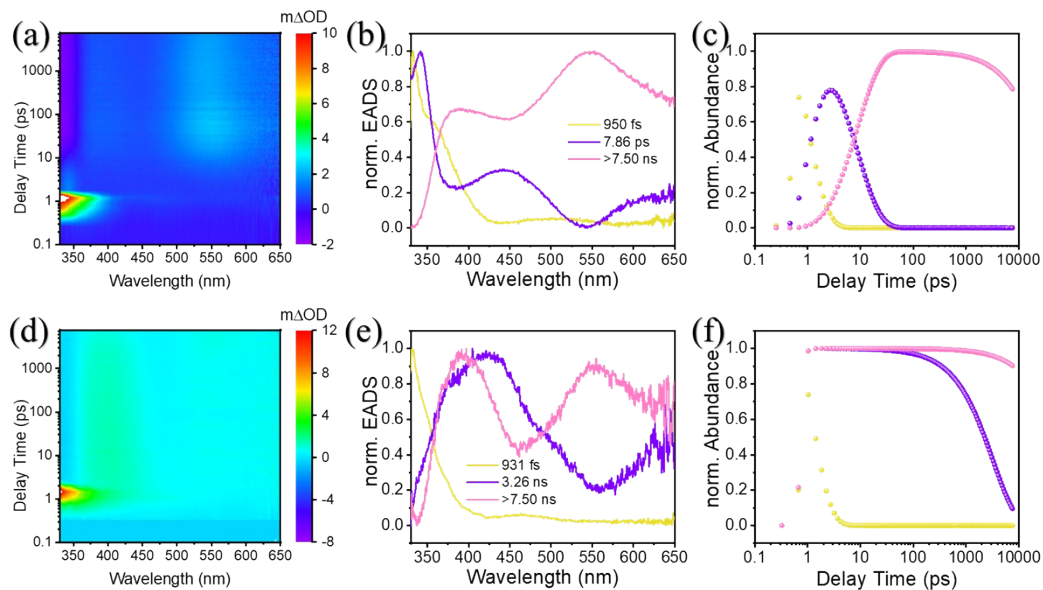

**Fig. S9.** (a)Fs-TA spectra, (b) normalized EADS obtained from global analysis ( $\text{RMS}=1.9\times 10^{-4}$ ), and (c) time evolution of the state population (the color of the fitting trace is consistent with the EADS spectra represented in Fig. S9b) of the *m*-TPA-BP measured in cyclohexane; (d)Fs-TA spectra, (e) normalized EADS obtained from global analysis ( $\text{RMS}=1.7\times 10^{-4}$ ), and (f) time evolution of the state population (the color of the fitting trace is consistent with the EADS spectra represented in Fig. S9e) of the *m*-TPA-BP measured in DCM.

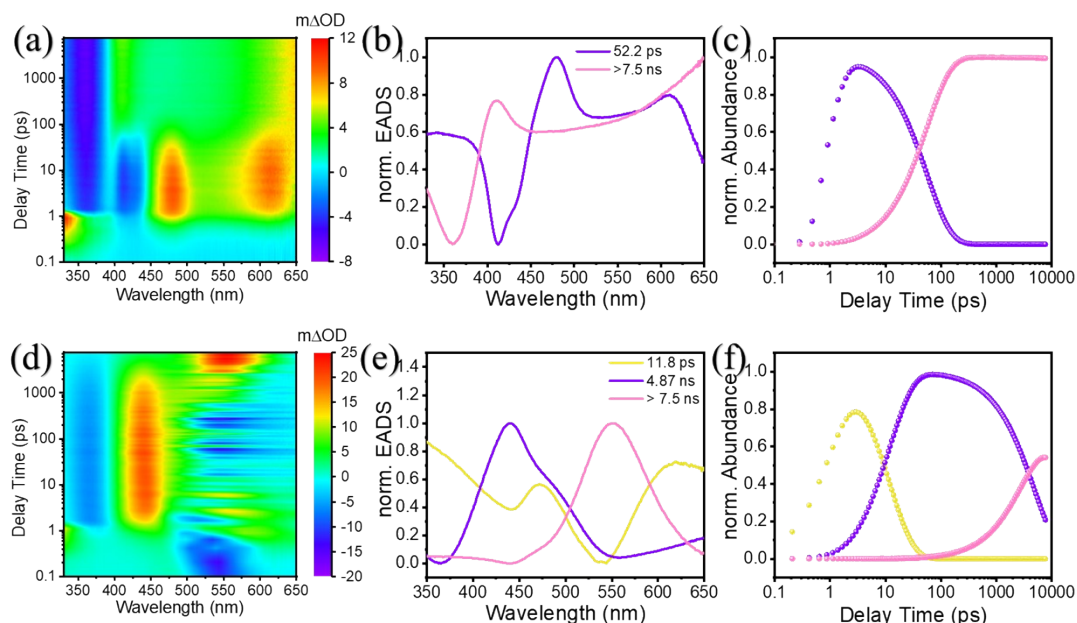

**Fig. S10.** (a)Fs-TA spectra, (b) normalized EADS obtained from global analysis ( $\text{RMS}=2.1 \times 10^{-4}$ ), and (c) time evolution of the state population (the color of the fitting trace is consistent with the EADS spectra represented in Fig. S10b) of the *p*-TPA-BP measured in cyclohexane; (d)Fs-TA spectra, (e) normalized EADS obtained from global analysis ( $\text{RMS}=2.2 \times 10^{-3}$ ), and (f) time evolution of the state population (the color of the fitting trace is consistent with the EADS spectra represented in Fig. S10e) of the *p*-TPA-BP measured in DCM.

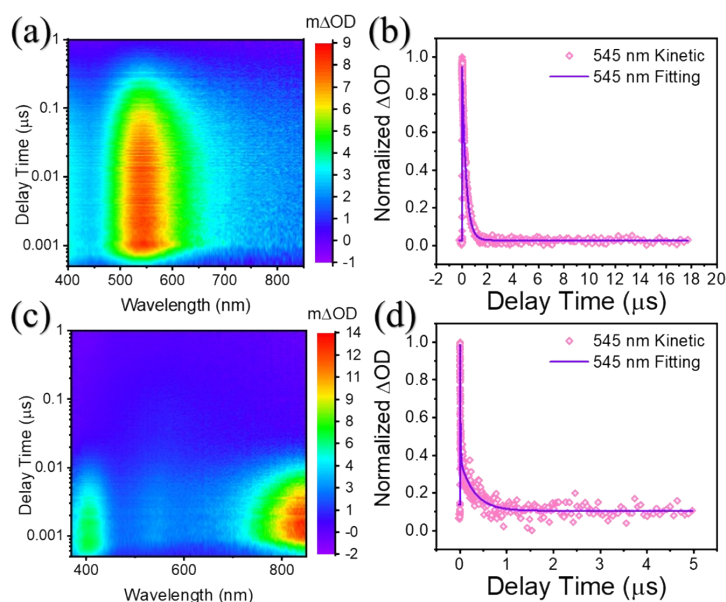

**Fig. S11.** (a)Ns-TA spectra, and (b) kinetic fitting at 545 nm ( $\tau=315.6$  ns) for *m*-TPA-BP measured in cyclohexane; (c) Ns-TA spectra, and (b) kinetic fitting at 545 nm ( $\tau=303.4$  ns) for *m*-TPA-BP measured in DCM.

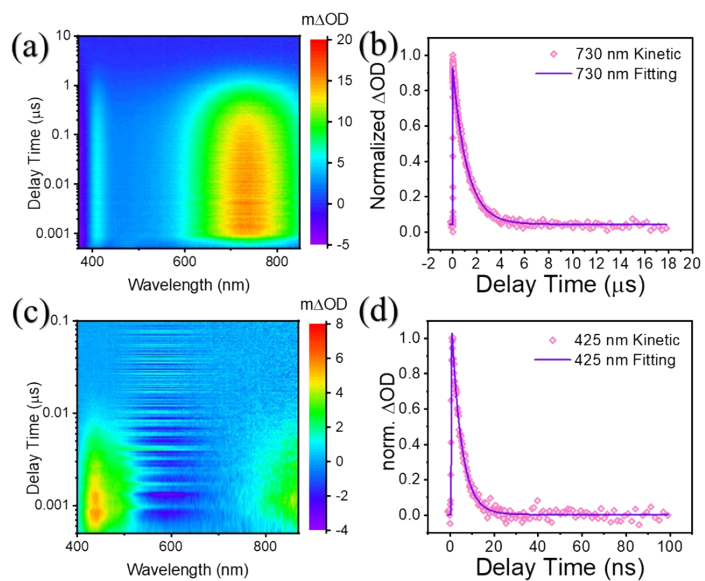

**Fig. S12.** (a) Ns-TA spectra, (b) kinetic fitting at 425 nm ( $\tau = 1.15 \mu\text{s}$ ) for *p*-TPA-BP measured in cyclohexane; (c) Ns-TA spectra, (d) kinetic fitting at 440 nm ( $\tau_1 = 4.60 \text{ ns}$ ,  $\tau_2 = 36.2 \text{ ns}$ ) and for *p*-TPA-BP measured in DCM.

## F. DFT calculations and TD-DFT calculations

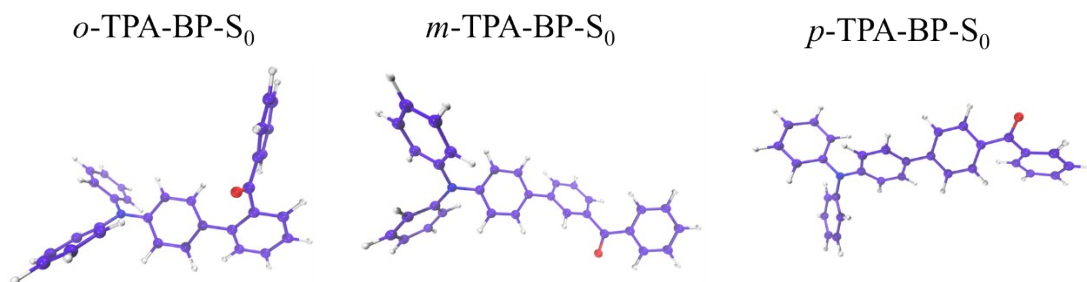

**Fig. S13.** Minimal-energy geometry of *o*-TPA-BP, *m*-TPA-BP, and *p*-TPA-BP in ground state.

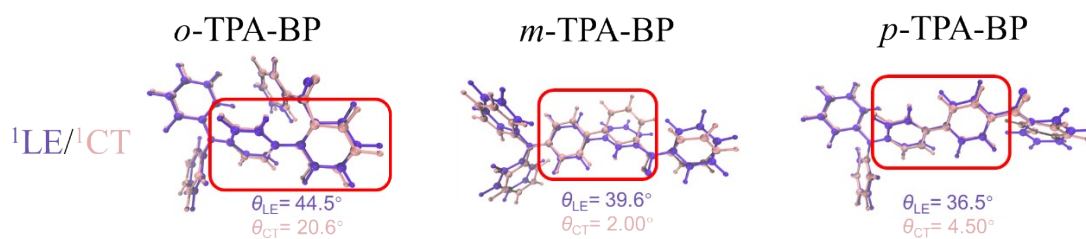

**Fig. S14.** Comparison of the minimal-energy geometry of *o*-TPA-BP, *m*-TPA-BP, and *p*-TPA-BP in LE state and CT state.

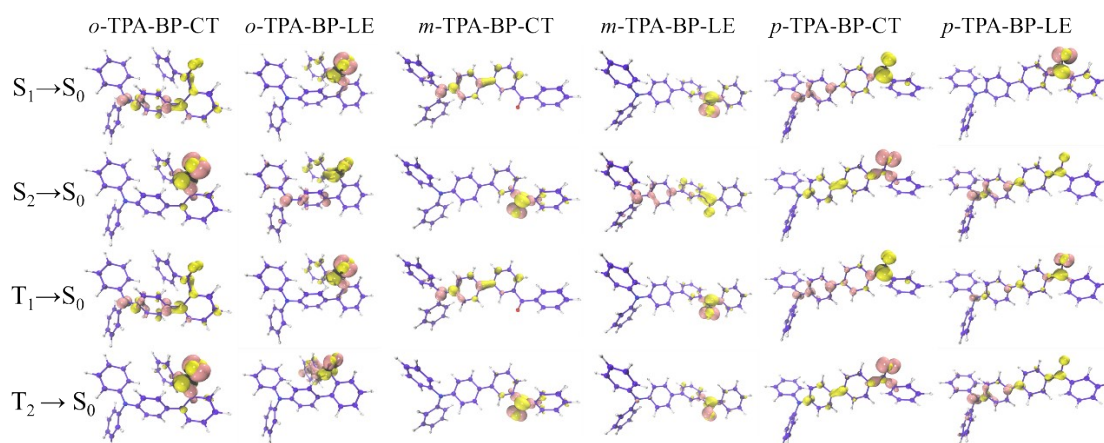

**Fig. S15.** Electron-hole distribution of the different transitions for *o*-TPA-BP, *m*-TPA-BP, and *p*-TPA-BP in excited state (The pink isosurface represent for electron and yellow isosurface represent for hole, isovalue = 0.005).

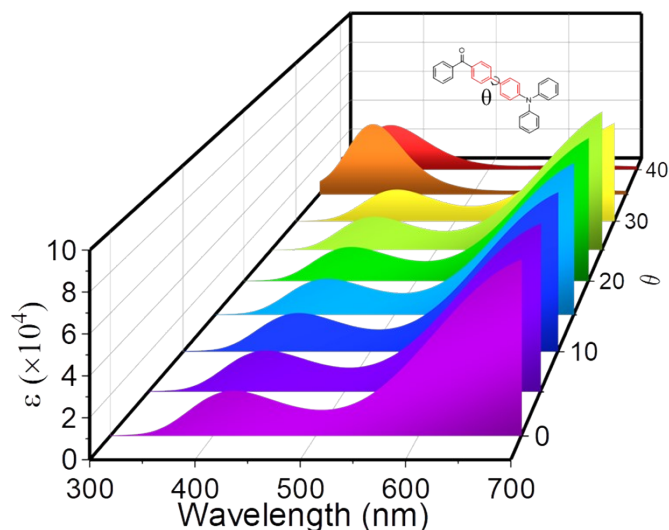

**Fig. S16** . TD-DFT simulated excited-state absorption spectra of the CT state with different dihedral between two highlight phenyl rings of *p*-TPA-BP.

**Table S1.** Vertical absorption energy and the corresponding oscillator strength of *o*-TPA-BP, *m*-TPA-BP, and *p*-TPA-BP based on the  $S_0$  state geometry.

| $S_0$ geometry   |               |           |                  |               |           |                  |               |           |
|------------------|---------------|-----------|------------------|---------------|-----------|------------------|---------------|-----------|
| <i>o</i> -TPA-BP |               |           | <i>m</i> -TPA-BP |               |           | <i>p</i> -TPA-BP |               |           |
| Singlet          | $E_{VA}$ (eV) | $f_{osc}$ | Singlet          | $E_{VA}$ (eV) | $f_{osc}$ | Singlet          | $E_{VA}$ (eV) | $f_{osc}$ |
| S1               | 3.706         | 0.004     | S1               | 3.735         | 0.001     | S1               | 3.707         | 0.040     |
| S2               | 4.003         | 0.334     | S2               | 4.074         | 0.680     | S2               | 3.885         | 0.838     |
| S3               | 4.244         | 0.127     | S3               | 4.247         | 0.025     | S3               | 4.258         | 0.020     |
| S4               | 4.341         | 0.124     | S4               | 4.317         | 0.059     | S4               | 4.456         | 0.225     |
| S5               | 4.433         | 0.237     | S5               | 4.444         | 0.228     | S5               | 4.76          | 0.008     |
| S6               | 4.916         | 0.053     | S6               | 4.895         | 0.056     | S6               | 4.878         | 0.049     |
| S7               | 4.965         | 0.059     | S7               | 4.976         | 0.066     | S7               | 4.975         | 0.009     |
| S8               | 5.057         | 0.013     | S8               | 5.142         | 0.021     | S8               | 5.013         | 0.028     |
| S9               | 5.192         | 0.016     | S9               | 5.216         | 0.020     | S9               | 5.208         | 0.086     |
| S10              | 5.262         | 0.055     | S10              | 5.355         | 0.064     | S10              | 5.242         | 0.360     |



**Table S2.** Vertical emission energy of *o*-TPA-BP, *m*-TPA-BP, and *p*-TPA-BP based on the LE state geometry.

| LE geometry      |               |          |               |                  |               |          |               |                  |               |          |               |
|------------------|---------------|----------|---------------|------------------|---------------|----------|---------------|------------------|---------------|----------|---------------|
| <i>o</i> -TPA-BP |               |          |               | <i>m</i> -TPA-BP |               |          |               | <i>p</i> -TPA-BP |               |          |               |
| Single t         | $E_{VE}$ (eV) | Triple t | $E_{VE}$ (eV) | Single t         | $E_{VE}$ (eV) | Triple t | $E_{VE}$ (eV) | Single t         | $E_{VE}$ (eV) | Triple t | $E_{VE}$ (eV) |
| S1               | 2.996         | T1       | 2.562         | S1               | 3.166         | T1       | 2.64          | S1               | 3.155         | T1       | 2.598         |
| S2               | 3.499         | T2       | 3.167         | S2               | 3.926         | T2       | 3.19          | S2               | 3.721         | T2       | 2.998         |
| S3               | 4.103         | T3       | 3.179         | S3               | 4.114         | T3       | 3.326         | S3               | 4.257         | T3       | 3.335         |
| S4               | 4.318         | T4       | 3.487         | S4               | 4.269         | T4       | 3.579         | S4               | 4.46          | T4       | 3.592         |
| S5               | 4.449         | T5       | 3.599         | S5               | 4.447         | T5       | 3.673         | S5               | 4.575         | T5       | 3.729         |
| S6               | 4.715         | T6       | 3.894         | S6               | 4.889         | T6       | 3.819         | S6               | 4.822         | T6       | 3.821         |
| S7               | 4.828         | T7       | 3.978         | S7               | 4.908         | T7       | 3.835         | S7               | 4.888         | T7       | 4.205         |
| S8               | 4.911         | T8       | 4.099         | S8               | 4.976         | T8       | 4.145         | S8               | 4.93          | T8       | 4.296         |
| S9               | 4.932         | T9       | 4.219         | S9               | 4.985         | T9       | 4.304         | S9               | 4.987         | T9       | 4.307         |
| S10              | 4.973         | T10      | 4.364         | S10              | 5.023         | T10      | 4.328         | S10              | 5.001         | T10      | 4.352         |

**Table S3.** Vertical emission energy of *o*-TPA-BP, *m*-TPA-BP, and *p*-TPA-BP based on the CT state geometry.

| CT geometry      |               |          |               |                  |               |          |               |                  |               |          |               |
|------------------|---------------|----------|---------------|------------------|---------------|----------|---------------|------------------|---------------|----------|---------------|
| <i>o</i> -TPA-BP |               |          |               | <i>m</i> -TPA-BP |               |          |               | <i>p</i> -TPA-BP |               |          |               |
| Singlet          | $E_{VE}$ (eV) | Triple t | $E_{VE}$ (eV) | Single t         | $E_{VE}$ (eV) | Triple t | $E_{VE}$ (eV) | Single t         | $E_{VE}$ (eV) | Triple t | $E_{VE}$ (eV) |
| S1               | 3.067         | T1       | 2.518         | S1               | 3.355         | T1       | 2.230         | S1               | 3.151         | T1       | 2.211         |
| S2               | 3.540         | T2       | 3.135         | S2               | 3.738         | T2       | 3.276         | S2               | 3.683         | T2       | 3.198         |
| S3               | 4.162         | T3       | 3.175         | S3               | 3.813         | T3       | 3.361         | S3               | 3.889         | T3       | 3.463         |
| S4               | 4.356         | T4       | 3.547         | S4               | 4.170         | T4       | 3.536         | S4               | 4.15          | T4       | 3.544         |
| S5               | 4.475         | T5       | 3.596         | S5               | 4.299         | T5       | 3.689         | S5               | 4.322         | T5       | 3.636         |
| S6               | 4.664         | T6       | 3.759         | S6               | 4.740         | T6       | 3.820         | S6               | 4.606         | T6       | 3.777         |
| S7               | 4.821         | T7       | 3.979         | S7               | 4.798         | T7       | 3.949         | S7               | 4.647         | T7       | 3.855         |
| S8               | 4.861         | T8       | 4.121         | S8               | 4.951         | T8       | 4.179         | S8               | 4.842         | T8       | 4.132         |
| S9               | 4.909         | T9       | 4.194         | S9               | 5.022         | T9       | 4.245         | S9               | 4.91          | T9       | 4.154         |
| S10              | 4.992         | T10      | 4.316         | S10              | 5.205         | T10      | 4.368         | S10              | 5.025         | T10      | 4.333         |

**Table S4.** Energy gap between singlet state and triplet state ( $\Delta E_{ST}$ ) and SOCME of *o*-TPA-BP, *m*-TPA-BP, and *p*-TPA-BP based on the LE state geometry.

| LE geometry      |                                           |                      |                           |
|------------------|-------------------------------------------|----------------------|---------------------------|
|                  | S-T                                       | $\Delta E_{ST}$ (eV) | SOCME (cm <sup>-1</sup> ) |
| <i>o</i> -TPA-BP | S1-T1 ( <sup>1</sup> LE- <sup>3</sup> LE) | 0.94                 | 4.34                      |
|                  | S1-T2 ( <sup>1</sup> LE- <sup>3</sup> CT) | -0.05                | 14.39                     |
|                  | S1-T3                                     | -0.31                | 27.49                     |
| <i>m</i> -TPA-BP | S1-T1 ( <sup>1</sup> LE- <sup>3</sup> LE) | 0.53                 | 13.86                     |
|                  | S1-T2 ( <sup>1</sup> LE- <sup>3</sup> CT) | -0.02                | 29.42                     |
|                  | S1-T3                                     | -0.16                | 23.27                     |
| <i>p</i> -TPA-BP | S1-T1 ( <sup>1</sup> LE- <sup>3</sup> LE) | 0.56                 | 16.30                     |
|                  | S1-T2 ( <sup>1</sup> LE- <sup>3</sup> CT) | 0.16                 | 19.45                     |
|                  | S1-T3                                     | -0.18                | 30.54                     |

**Table S5.** Energy gap between singlet state and triplet state ( $\Delta E_{ST}$ ) and SOCME of *o*-TPA-BP, *m*-TPA-BP, and *p*-TPA-BP based on the CT state geometry.

| CT geometry      |                                           |                      |                           |
|------------------|-------------------------------------------|----------------------|---------------------------|
|                  | S-T                                       | $\Delta E_{ST}$ (eV) | SOCME (cm <sup>-1</sup> ) |
| <i>o</i> -TPA-BP | S1-T1( <sup>1</sup> CT- <sup>3</sup> CT)  | 0.55                 | 0.25                      |
|                  | S1-T2 ( <sup>1</sup> CT- <sup>3</sup> LE) | -0.07                | 2.48                      |
|                  | S1-T3                                     | -0.11                | 1.99                      |
| <i>m</i> -TPA-BP | S1-T1( <sup>1</sup> CT- <sup>3</sup> CT)  | 1.13                 | 0.18                      |
|                  | S1-T2 ( <sup>1</sup> CT- <sup>3</sup> LE) | 0.08                 | 0.34                      |
|                  | S1-T3                                     | -0.01                | 0.63                      |
| <i>p</i> -TPA-BP | S1-T1( <sup>1</sup> CT- <sup>3</sup> CT)  | 1.09                 | 0.42                      |
|                  | S1-T2 ( <sup>1</sup> CT- <sup>3</sup> LE) | 0.01                 | 5.54                      |
|                  | S1-T3                                     | -0.27                | 3.72                      |

## G. $^1\text{H}$ NMR and $^{13}\text{C}$ NMR spectra

$^1\text{H}$  NMR spectra of *o*-TPA-BP:

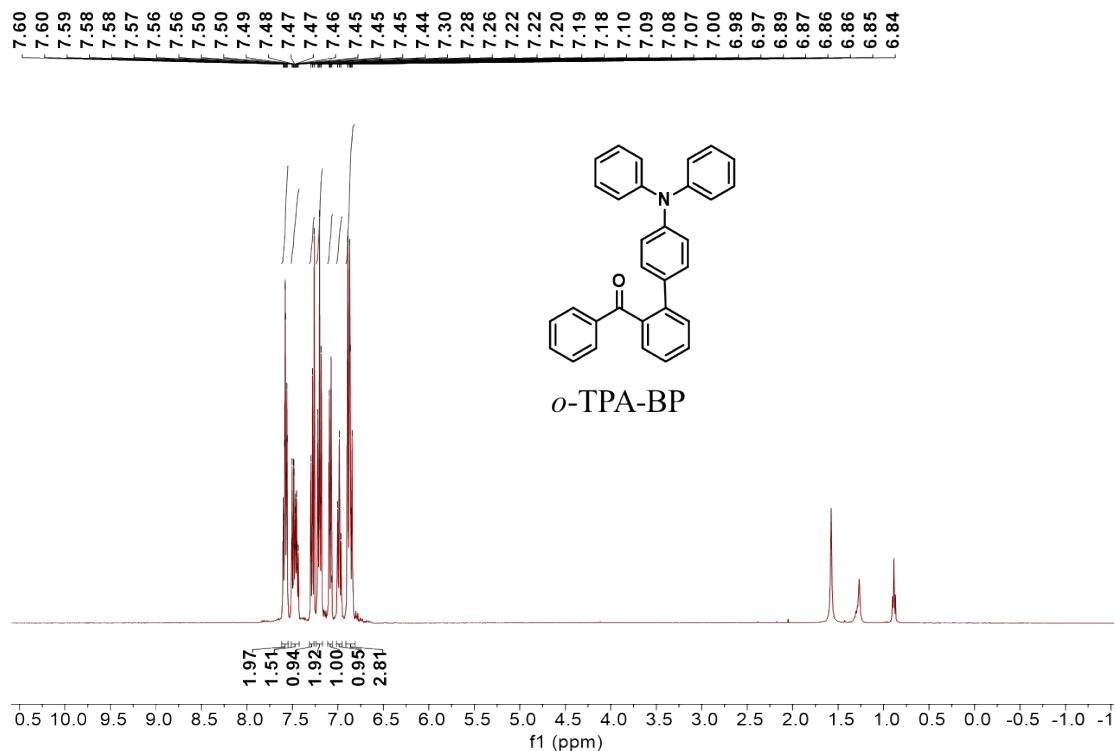

$^{13}\text{C}$  NMR spectra of *o*-TPA-BP:

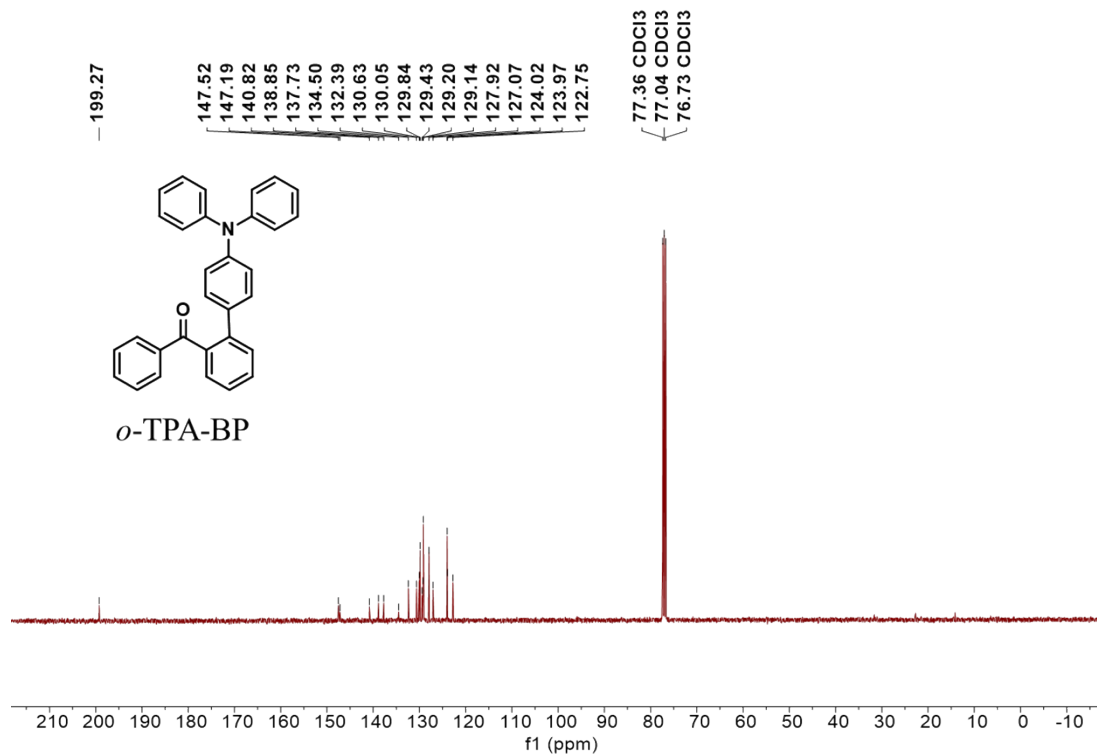

**<sup>1</sup>H NMR spectra of *m*-TPA-BP:**

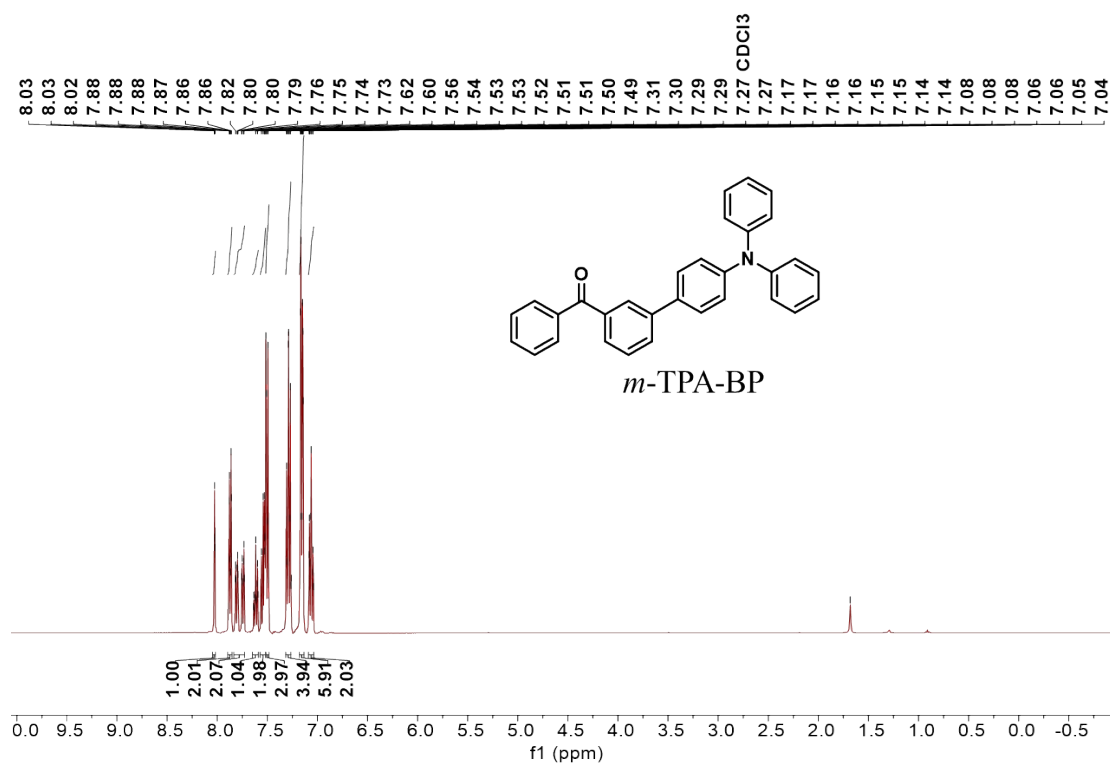

**<sup>13</sup>C NMR spectra of *m*-TPA-BP:**

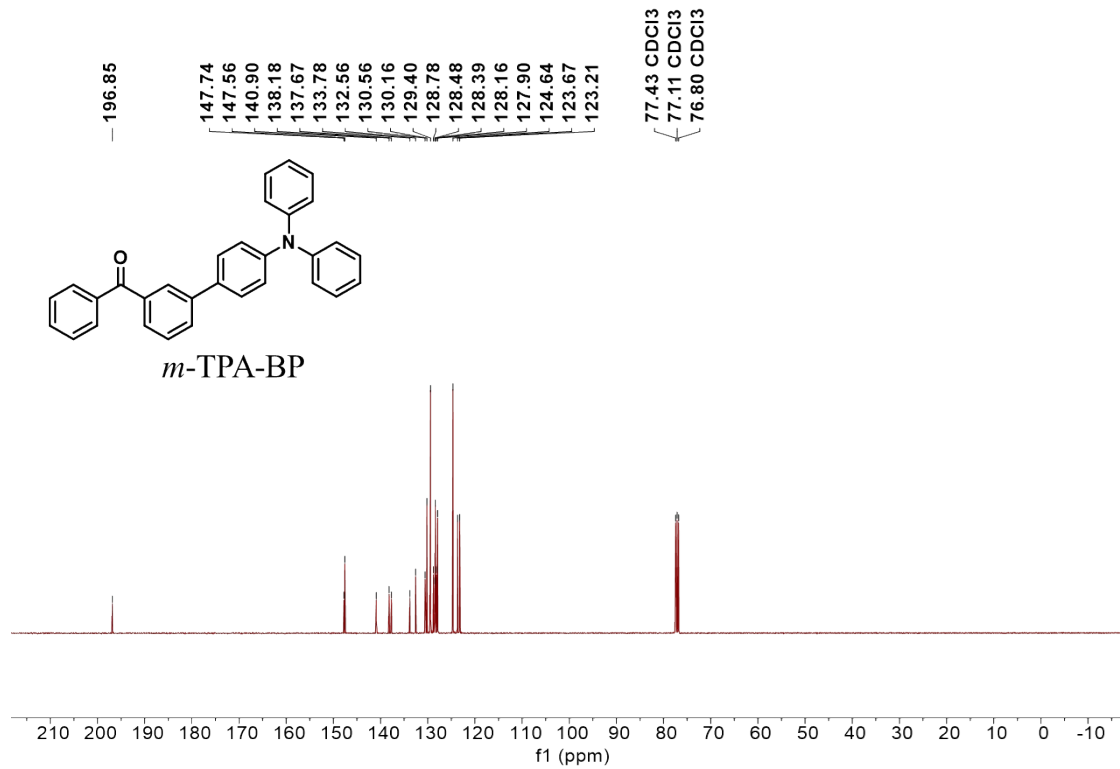

**<sup>1</sup>H NMR spectra of *p*-TPA-BP:**

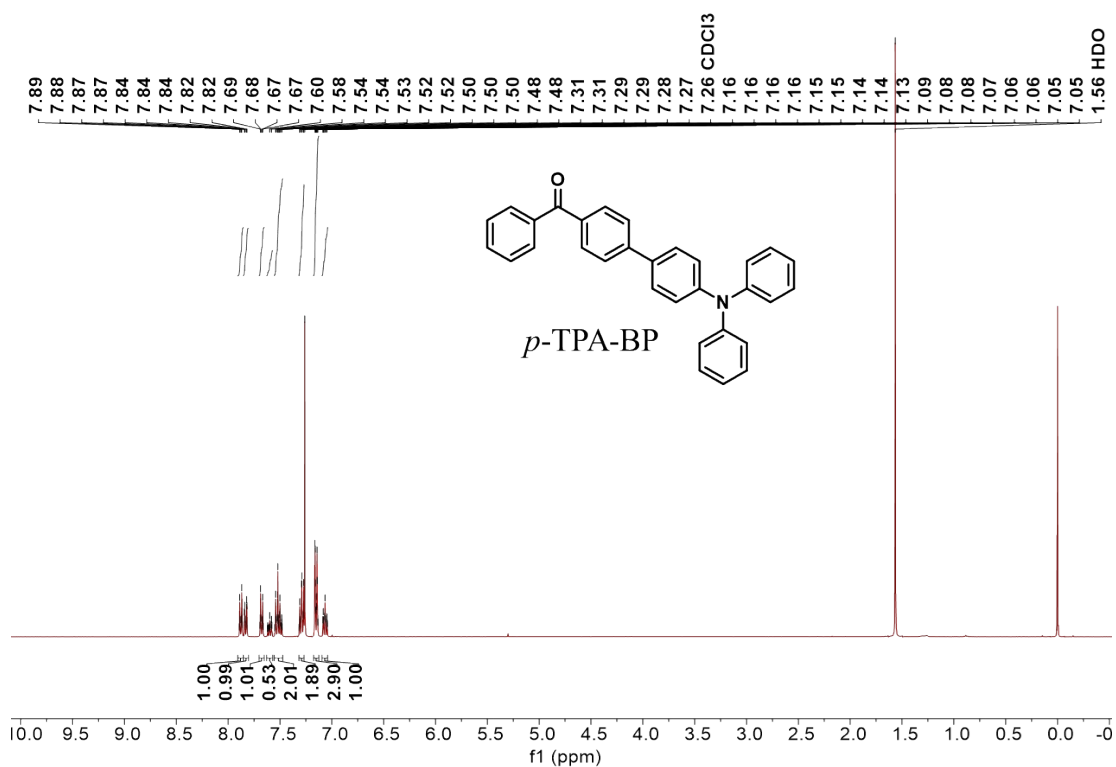

**<sup>13</sup>C NMR spectra of *p*-TPA-BP:**

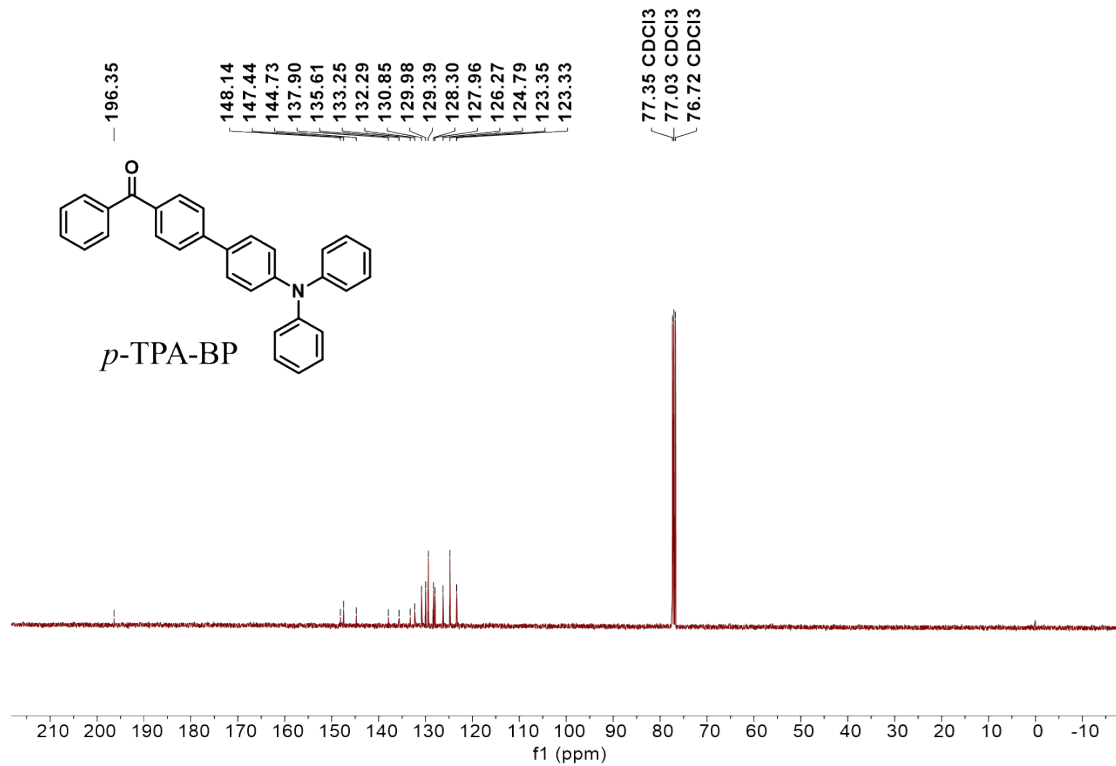

## H. XYZ Coordinate

*o*-TPA-BP S<sub>0</sub>:

|   |             |             |             |
|---|-------------|-------------|-------------|
| C | 4.69878100  | 2.81114800  | 2.45342100  |
| C | 4.05692800  | 1.59071000  | 2.31127700  |
| C | 4.02332900  | 0.95580900  | 1.06776900  |
| C | 4.62255700  | 1.56462400  | -0.03617100 |
| C | 5.25562800  | 2.79484000  | 0.10607300  |
| C | 5.29907200  | 3.41423800  | 1.34974400  |
| H | 4.73026500  | 3.29768000  | 3.42077700  |
| H | 3.56884200  | 1.10694400  | 3.14866400  |
| H | 4.58507400  | 1.08273500  | -1.00627800 |
| H | 5.71374100  | 3.26882000  | -0.75344400 |
| H | 5.79754200  | 4.37004300  | 1.46027900  |
| C | 3.28118100  | -0.34412500 | 0.96019200  |
| O | 2.54007900  | -0.71093600 | 1.83941400  |
| C | 3.50701200  | -1.19959300 | -0.25962400 |
| C | 2.43123900  | -1.69825600 | -1.01092400 |
| C | 4.81115100  | -1.59947200 | -0.55149700 |
| C | 2.70377900  | -2.60721500 | -2.03657800 |
| C | 5.06264300  | -2.51473400 | -1.56534000 |
| H | 5.63015700  | -1.20558100 | 0.04103200  |
| C | 4.00177300  | -3.02026900 | -2.30773500 |
| H | 1.88119600  | -2.97461200 | -2.63985500 |
| H | 6.07770600  | -2.83017700 | -1.77283700 |
| H | 4.18547900  | -3.72701200 | -3.10817100 |
| C | 1.03484300  | -1.25403900 | -0.77849200 |
| C | 0.71861400  | 0.10132200  | -0.66108700 |
| C | -0.00379300 | -2.18273500 | -0.70070600 |
| C | -0.58642400 | 0.51770400  | -0.45647800 |
| H | 1.50703000  | 0.84462100  | -0.72736100 |
| C | -1.31534500 | -1.77630600 | -0.50764500 |
| H | 0.22136800  | -3.24062300 | -0.77704400 |
| C | -1.62080300 | -0.41945100 | -0.37621100 |
| H | -0.81480600 | 1.57214500  | -0.35856400 |
| H | -2.11124000 | -2.50851200 | -0.44220600 |
| N | -2.95455300 | -0.00361100 | -0.15748400 |
| C | -3.44440400 | 1.16871700  | -0.78047100 |
| C | -3.10073300 | 1.46145300  | -2.10349600 |
| C | -4.27711100 | 2.04753700  | -0.08182000 |
| C | -3.57620700 | 2.61679900  | -2.70877800 |
| H | -2.45824500 | 0.77892300  | -2.64704100 |
| C | -4.76131000 | 3.19134000  | -0.70212400 |

|   |             |             |             |
|---|-------------|-------------|-------------|
| H | -4.54090000 | 1.82415400  | 0.94501700  |
| C | -4.41202400 | 3.48647700  | -2.01584200 |
| H | -3.30072100 | 2.83054500  | -3.73475900 |
| H | -5.40614700 | 3.86293500  | -0.14773800 |
| H | -4.78648000 | 4.38310800  | -2.49370700 |
| C | -3.78823400 | -0.74240200 | 0.71753300  |
| C | -5.13475500 | -0.94615000 | 0.40383700  |
| C | -3.27359500 | -1.27529600 | 1.90257400  |
| C | -5.95086400 | -1.66370400 | 1.26789300  |
| H | -5.53227200 | -0.53507300 | -0.51658100 |
| C | -4.09417600 | -2.00653400 | 2.75098300  |
| H | -2.23013600 | -1.11549000 | 2.14765600  |
| C | -5.43659800 | -2.20196800 | 2.44306500  |
| H | -6.99325900 | -1.81333700 | 1.01249400  |
| H | -3.68137700 | -2.41491800 | 3.66578400  |
| H | -6.07450000 | -2.76736000 | 3.11090000  |

*o*-TPA-BP LE:

|   |             |             |             |
|---|-------------|-------------|-------------|
| C | -1.28863400 | 3.58734200  | 0.88443900  |
| C | -2.17961400 | 2.92473500  | 0.05668400  |
| C | -2.68504900 | 1.65871500  | 0.42114700  |
| C | -2.25399800 | 1.08281000  | 1.63411000  |
| C | -1.35236400 | 1.75358500  | 2.44169800  |
| C | -0.86233400 | 3.01004100  | 2.07947300  |
| H | -0.92395000 | 4.56639000  | 0.59435700  |
| H | -2.50063500 | 3.37551200  | -0.87434400 |
| H | -2.63892100 | 0.11595600  | 1.93554700  |
| H | -1.02995800 | 1.29566300  | 3.36961400  |
| H | -0.16118600 | 3.52944500  | 2.72119500  |
| C | -3.60745100 | 0.98255900  | -0.44591900 |
| O | -4.03756400 | 1.48335200  | -1.55140000 |
| C | -4.08100600 | -0.43195900 | -0.32325700 |
| C | -3.17382500 | -1.51528900 | -0.26954000 |
| C | -5.46192000 | -0.66401200 | -0.28685000 |
| C | -3.69970100 | -2.79648800 | -0.06467300 |
| C | -5.95539700 | -1.94500200 | -0.11052100 |
| H | -6.13161800 | 0.18348300  | -0.36438200 |
| C | -5.06749100 | -3.01259800 | 0.01132800  |
| H | -3.01595500 | -3.63611900 | -0.01416600 |
| H | -7.02405900 | -2.11268900 | -0.06103100 |
| H | -5.44448300 | -4.01932600 | 0.14618100  |
| C | -1.71658500 | -1.31395000 | -0.37662100 |
| C | -1.17033400 | -0.45671900 | -1.34016900 |
| C | -0.84972000 | -1.93190300 | 0.52847900  |

|   |             |             |             |
|---|-------------|-------------|-------------|
| C | 0.18360200  | -0.18715000 | -1.36113100 |
| H | -1.81965400 | 0.00595700  | -2.07496200 |
| C | 0.50901000  | -1.65861900 | 0.52295800  |
| H | -1.25553100 | -2.58633000 | 1.29248700  |
| C | 1.03678500  | -0.75911900 | -0.40725200 |
| H | 0.59624700  | 0.48738100  | -2.10144300 |
| H | 1.16131800  | -2.10819900 | 1.26157700  |
| N | 2.39738200  | -0.39570600 | -0.37918000 |
| C | 2.75091600  | 0.96986400  | -0.53526700 |
| C | 1.93507100  | 1.97622000  | -0.01070800 |
| C | 3.92319400  | 1.31550700  | -1.21207800 |
| C | 2.29159000  | 3.30852100  | -0.17031700 |
| H | 1.02169900  | 1.71685500  | 0.51349400  |
| C | 4.27671500  | 2.65068800  | -1.35191300 |
| H | 4.55019400  | 0.53154400  | -1.62037000 |
| C | 3.46302900  | 3.65484300  | -0.83583300 |
| H | 1.64780500  | 4.07651500  | 0.24238300  |
| H | 5.18817200  | 2.90705700  | -1.87875700 |
| H | 3.73918000  | 4.69541800  | -0.95290600 |
| C | 3.37929200  | -1.34128300 | 0.00333300  |
| C | 4.40325200  | -0.99186200 | 0.88746300  |
| C | 3.32830900  | -2.64236100 | -0.50530600 |
| C | 5.36180100  | -1.93020200 | 1.24750200  |
| H | 4.44185000  | 0.01520300  | 1.28485900  |
| C | 4.28153500  | -3.57707300 | -0.12605600 |
| H | 2.53718000  | -2.90875700 | -1.19632600 |
| C | 5.30585300  | -3.22705900 | 0.74835900  |
| H | 6.15080000  | -1.64613600 | 1.93368500  |
| H | 4.23057600  | -4.58179000 | -0.52852800 |
| H | 6.05256600  | -3.95660500 | 1.03591400  |

o-TPA-BP CT:

|   |             |            |             |
|---|-------------|------------|-------------|
| C | -1.42386100 | 3.52884600 | 0.67361800  |
| C | -2.29209200 | 2.81629000 | -0.14232200 |
| C | -2.82638500 | 1.60044800 | 0.28511100  |
| C | -2.49879100 | 1.11421100 | 1.55130900  |
| C | -1.63307200 | 1.82970900 | 2.37065500  |
| C | -1.09023500 | 3.03471800 | 1.93203200  |
| H | -1.01608400 | 4.47339500 | 0.33250300  |
| H | -2.57996700 | 3.18877300 | -1.11804900 |
| H | -2.92719900 | 0.18208600 | 1.89985700  |
| H | -1.38817500 | 1.45112300 | 3.35577800  |
| H | -0.41578200 | 3.59029400 | 2.57436300  |
| C | -3.79123500 | 0.90299200 | -0.63893400 |



|   |             |             |             |
|---|-------------|-------------|-------------|
| O | -4.39094300 | 1.55894200  | -1.47121400 |
| C | -4.05736700 | -0.55134500 | -0.47888200 |
| C | -3.06441900 | -1.53828700 | -0.09892900 |
| C | -5.39095500 | -0.92891800 | -0.61486400 |
| C | -3.56968000 | -2.80699000 | 0.35127700  |
| C | -5.82684800 | -2.19830700 | -0.26333800 |
| H | -6.09429400 | -0.17463000 | -0.94776200 |
| C | -4.89725900 | -3.12695100 | 0.25623800  |
| H | -2.87422400 | -3.56522900 | 0.68579600  |
| H | -6.87357800 | -2.46036900 | -0.34792000 |
| H | -5.23354600 | -4.11006400 | 0.56370200  |
| C | -1.67636700 | -1.33167500 | -0.24145900 |
| C | -1.12455800 | -0.34146000 | -1.15380800 |
| C | -0.69776600 | -2.09885800 | 0.52282500  |
| C | 0.19591600  | -0.05365500 | -1.19189600 |
| H | -1.78990700 | 0.14132900  | -1.85896900 |
| C | 0.62378000  | -1.79392500 | 0.49961000  |
| H | -1.03916600 | -2.86476400 | 1.20526900  |
| C | 1.12233500  | -0.73194800 | -0.32295900 |
| H | 0.58086900  | 0.66581300  | -1.90484900 |
| H | 1.31457400  | -2.32272800 | 1.14577100  |
| N | 2.44646700  | -0.33237600 | -0.26146500 |
| C | 2.77501300  | 1.04117400  | -0.39051000 |
| C | 1.93034500  | 2.01010800  | 0.16114800  |
| C | 3.92799200  | 1.43106900  | -1.07981100 |
| C | 2.24226100  | 3.35467000  | 0.01811700  |
| H | 1.03753200  | 1.70607700  | 0.69579200  |
| C | 4.23150600  | 2.77818600  | -1.20607300 |
| H | 4.57110700  | 0.67542300  | -1.51473900 |
| C | 3.39158800  | 3.74672600  | -0.66070800 |
| H | 1.58213700  | 4.09683500  | 0.45113200  |
| H | 5.12372000  | 3.07422400  | -1.74437400 |
| H | 3.63170700  | 4.79725800  | -0.76676600 |
| C | 3.47142500  | -1.27992000 | -0.01394600 |
| C | 4.52354800  | -0.97516900 | 0.85490000  |
| C | 3.41996800  | -2.53280000 | -0.63139900 |
| C | 5.51391400  | -1.91640100 | 1.09387500  |
| H | 4.55177900  | -0.00584900 | 1.33774900  |
| C | 4.41218500  | -3.46914200 | -0.37691600 |
| H | 2.60456700  | -2.75419400 | -1.30974500 |
| C | 5.46337800  | -3.16662900 | 0.48299400  |
| H | 6.32457100  | -1.67551700 | 1.77081200  |
| H | 4.36846100  | -4.43618000 | -0.86300800 |
| H | 6.23760200  | -3.89861600 | 0.67590700  |

*m*-TPA-BP S<sub>0</sub>:

|   |             |             |             |
|---|-------------|-------------|-------------|
| C | -8.62187600 | -0.57338000 | -1.37879400 |
| C | -7.32512800 | -1.04860100 | -1.25157200 |
| C | -6.33605500 | -0.24740100 | -0.67808700 |
| C | -6.65105900 | 1.04783100  | -0.26414300 |
| C | -7.94687700 | 1.52991000  | -0.41182900 |
| C | -8.93368500 | 0.71731800  | -0.95845100 |
| H | -9.38952600 | -1.20337400 | -1.81152300 |
| H | -7.05262300 | -2.03949100 | -1.59416200 |
| H | -5.87974000 | 1.68614200  | 0.15021000  |
| H | -8.18480500 | 2.54037700  | -0.10245300 |
| H | -9.94504300 | 1.09156500  | -1.06442400 |
| C | -4.94102300 | -0.79511200 | -0.61463100 |
| O | -4.57091200 | -1.61276900 | -1.42635800 |
| C | -4.00636900 | -0.32395600 | 0.46072000  |
| C | -2.64037600 | -0.34531000 | 0.18444500  |
| C | -4.45303000 | 0.05749600  | 1.72645500  |
| C | -1.70531400 | 0.03731400  | 1.14529500  |
| H | -2.32120400 | -0.65156800 | -0.80518700 |
| C | -3.52839200 | 0.42122900  | 2.69885400  |
| H | -5.51131100 | 0.04533100  | 1.95765700  |
| C | -2.17069200 | 0.41976200  | 2.40921100  |
| H | -3.86739600 | 0.69627700  | 3.69029300  |
| H | -1.45594500 | 0.68941900  | 3.17861900  |
| C | -0.25547100 | 0.03314900  | 0.83841300  |
| C | 0.58564100  | 1.04051500  | 1.31907700  |
| C | 0.31262000  | -0.97627900 | 0.05621900  |
| C | 1.94268400  | 1.04042600  | 1.03763600  |
| H | 0.16937800  | 1.84689500  | 1.91256700  |
| C | 1.66587000  | -0.97818400 | -0.24316900 |
| H | -0.31328200 | -1.77893600 | -0.31725300 |
| C | 2.50032900  | 0.03122800  | 0.24681500  |
| H | 2.57928900  | 1.83042400  | 1.41759000  |
| H | 2.08789400  | -1.76787500 | -0.85305100 |
| N | 3.88051400  | 0.03535900  | -0.05346100 |
| C | 4.59887300  | -1.18387100 | -0.11822000 |
| C | 5.55127500  | -1.38931000 | -1.11991500 |
| C | 4.36494800  | -2.19277000 | 0.81990200  |
| C | 6.26061500  | -2.58163800 | -1.17320700 |
| H | 5.73064300  | -0.60809300 | -1.84899400 |
| C | 5.06691100  | -3.38845400 | 0.74724500  |
| H | 3.62922100  | -2.03196100 | 1.59902500  |
| C | 6.02096800  | -3.58949100 | -0.24503400 |

|   |            |             |             |
|---|------------|-------------|-------------|
| H | 6.99647100 | -2.72715700 | -1.95513100 |
| H | 4.87429400 | -4.16270800 | 1.48038700  |
| H | 6.57098200 | -4.52090700 | -0.29443200 |
| C | 4.54520700 | 1.25797700  | -0.31861600 |
| C | 3.92263200 | 2.25175800  | -1.07857600 |
| C | 5.83373800 | 1.48088900  | 0.17422100  |
| C | 4.57723200 | 3.45013000  | -1.32959000 |
| H | 2.92574000 | 2.07693100  | -1.46559600 |
| C | 6.48679800 | 2.67556700  | -0.09743200 |
| H | 6.31563700 | 0.71041200  | 0.76439800  |
| C | 5.86295600 | 3.66868100  | -0.84556300 |
| H | 4.08216100 | 4.21201900  | -1.91994200 |
| H | 7.48613400 | 2.83458100  | 0.29003500  |
| H | 6.37303800 | 4.60179400  | -1.04961900 |

*m*-TPA-BP LE:

|   |             |             |             |
|---|-------------|-------------|-------------|
| C | 8.59220300  | 0.68182800  | -1.49445900 |
| C | 7.26866700  | 1.07310600  | -1.35841700 |
| C | 6.35308200  | 0.25145600  | -0.67847900 |
| C | 6.79485700  | -0.98064200 | -0.16573900 |
| C | 8.12309700  | -1.35168800 | -0.29927000 |
| C | 9.02993800  | -0.52552000 | -0.96038600 |
| H | 9.28765600  | 1.32866000  | -2.01595200 |
| H | 6.93729000  | 2.02310400  | -1.75837800 |
| H | 6.08958500  | -1.65016300 | 0.30990700  |
| H | 8.45028400  | -2.30374000 | 0.10170400  |
| H | 10.06533900 | -0.82538400 | -1.06345500 |
| C | 4.95494600  | 0.66361500  | -0.56140600 |
| O | 4.51031600  | 1.48871200  | -1.45458300 |
| C | 4.00294900  | 0.23793300  | 0.46639700  |
| C | 2.62755300  | 0.26017300  | 0.18860100  |
| C | 4.43835100  | -0.15350200 | 1.74341300  |
| C | 1.69223600  | -0.11879800 | 1.15093600  |
| H | 2.29180200  | 0.53436600  | -0.80424600 |
| C | 3.50796500  | -0.54432700 | 2.69261700  |
| H | 5.49166800  | -0.12248300 | 1.99034000  |
| C | 2.14606000  | -0.53040600 | 2.40753400  |
| H | 3.84734900  | -0.83920100 | 3.67860400  |
| H | 1.42933400  | -0.80673700 | 3.17177300  |
| C | 0.24314500  | -0.09184000 | 0.83903000  |
| C | -0.61035800 | -1.10082600 | 1.29382500  |
| C | -0.31241500 | 0.94235200  | 0.08077900  |
| C | -1.96683500 | -1.07815800 | 1.01038500  |
| H | -0.20341300 | -1.92491700 | 1.86897100  |

|   |             |             |             |
|---|-------------|-------------|-------------|
| C | -1.66499200 | 0.96695100  | -0.22142200 |
| H | 0.32334600  | 1.74745600  | -0.27018300 |
| C | -2.51164700 | -0.04396200 | 0.24323400  |
| H | -2.61326700 | -1.86936000 | 1.37081800  |
| H | -2.07718100 | 1.77616200  | -0.81218400 |
| N | -3.89183600 | -0.02398600 | -0.05799000 |
| C | -4.59554500 | 1.20481400  | -0.08987400 |
| C | -5.54753300 | 1.44754000  | -1.08365600 |
| C | -4.34708100 | 2.18682100  | 0.87287300  |
| C | -6.24170100 | 2.64974600  | -1.10522100 |
| H | -5.73845800 | 0.68730500  | -1.83174300 |
| C | -5.03385800 | 3.39272600  | 0.83196200  |
| H | -3.61197100 | 1.99705300  | 1.64603200  |
| C | -5.98723700 | 3.63089600  | -0.15269300 |
| H | -6.97735300 | 2.82415400  | -1.88142500 |
| H | -4.83003900 | 4.14560500  | 1.58411100  |
| H | -6.52547900 | 4.57015000  | -0.17731200 |
| C | -4.57107500 | -1.23167800 | -0.35272600 |
| C | -3.96012700 | -2.21421400 | -1.13637600 |
| C | -5.86206800 | -1.45141000 | 0.13510200  |
| C | -4.62860400 | -3.39859100 | -1.41567700 |
| H | -2.96105900 | -2.04201700 | -1.51891800 |
| C | -6.52896300 | -2.63162500 | -0.16473600 |
| H | -6.33477700 | -0.68994200 | 0.74408800  |
| C | -5.91675100 | -3.61372900 | -0.93660800 |
| H | -4.14235900 | -4.15198900 | -2.02398400 |
| H | -7.52995100 | -2.78834100 | 0.21939400  |
| H | -6.43756300 | -4.53578900 | -1.16261800 |

*m*-TPA-BP LE:

|   |            |             |             |
|---|------------|-------------|-------------|
| C | 8.63756700 | 1.23107000  | -0.59699800 |
| C | 7.34838300 | 1.50163500  | -0.16238300 |
| C | 6.33829400 | 0.55133600  | -0.32108100 |
| C | 6.62474600 | -0.66064600 | -0.95113400 |
| C | 7.91278600 | -0.92160900 | -1.40548600 |
| C | 8.92078200 | 0.01787800  | -1.21949800 |
| H | 9.42139100 | 1.96606600  | -0.45887900 |
| H | 7.09777700 | 2.44817000  | 0.30103200  |
| H | 5.83717700 | -1.38926300 | -1.10339500 |
| H | 8.12855200 | -1.85796400 | -1.90570300 |
| H | 9.92608900 | -0.19146900 | -1.56567800 |
| C | 4.95082400 | 0.92102800  | 0.11850700  |
| O | 4.60893300 | 2.08307700  | 0.11551900  |
| C | 4.00190300 | -0.15652400 | 0.54867700  |

|   |             |             |             |
|---|-------------|-------------|-------------|
| C | 2.65677600  | 0.08587400  | 0.37856800  |
| C | 4.44547500  | -1.34763900 | 1.16527800  |
| C | 1.65320900  | -0.85907800 | 0.77654200  |
| H | 2.38699800  | 1.03569300  | -0.06141800 |
| C | 3.48893900  | -2.28022400 | 1.59040100  |
| H | 5.49939600  | -1.51932100 | 1.33888900  |
| C | 2.14527300  | -2.06330700 | 1.40258500  |
| H | 3.81533700  | -3.19140300 | 2.07820900  |
| H | 1.45177400  | -2.82058800 | 1.73894500  |
| C | 0.28136000  | -0.62033800 | 0.57167900  |
| C | -0.75052100 | -1.55948000 | 1.01124100  |
| C | -0.21443000 | 0.58202100  | -0.09662600 |
| C | -2.06945600 | -1.33193200 | 0.80658200  |
| H | -0.46597600 | -2.45545300 | 1.54304000  |
| C | -1.53416700 | 0.80849300  | -0.29139400 |
| H | 0.48850300  | 1.30897300  | -0.47629500 |
| C | -2.52465200 | -0.13886500 | 0.14766400  |
| H | -2.80610600 | -2.03839800 | 1.17070800  |
| H | -1.86111100 | 1.69843500  | -0.81598200 |
| N | -3.87495400 | 0.09154100  | -0.06076200 |
| C | -4.39135500 | 1.41146500  | -0.01623800 |
| C | -5.36086000 | 1.82120800  | -0.93709300 |
| C | -3.91760600 | 2.31286300  | 0.94138400  |
| C | -5.85095800 | 3.11764200  | -0.89110600 |
| H | -5.71628200 | 1.12080300  | -1.68325300 |
| C | -4.40902900 | 3.61071700  | 0.97022200  |
| H | -3.17215500 | 1.98362900  | 1.65534900  |
| C | -5.37742400 | 4.01926700  | 0.05877900  |
| H | -6.59910200 | 3.42938100  | -1.60983400 |
| H | -4.03895100 | 4.30257100  | 1.71702300  |
| H | -5.75993300 | 5.03185000  | 0.08688400  |
| C | -4.75297700 | -0.99011800 | -0.32428400 |
| C | -4.33754400 | -2.03872000 | -1.15019900 |
| C | -6.02786800 | -1.02092000 | 0.24970500  |
| C | -5.19106500 | -3.10595800 | -1.39313500 |
| H | -3.35121200 | -2.00115800 | -1.59695300 |
| C | -6.87461600 | -2.08845300 | -0.00858400 |
| H | -6.34046900 | -0.20957100 | 0.89599300  |
| C | -6.46178300 | -3.13655500 | -0.82744900 |
| H | -4.86338800 | -3.91249800 | -2.03777300 |
| H | -7.85960100 | -2.10713000 | 0.44191000  |
| H | -7.12552500 | -3.96953300 | -1.02240400 |

$\rho$ -TPA-BP S<sub>0</sub>:

|   |             |             |             |
|---|-------------|-------------|-------------|
| C | 9.04829100  | 0.90078200  | -0.21033600 |
| C | 8.76026000  | 1.80214500  | 0.81155700  |
| C | 7.52411100  | 1.76384000  | 1.44667300  |
| C | 6.56496200  | 0.83939000  | 1.04797600  |
| C | 6.84726700  | -0.06126400 | 0.01977400  |
| C | 8.10047800  | -0.03607600 | -0.59478500 |
| C | 5.88243000  | -1.13066300 | -0.40104700 |
| C | 4.40892100  | -0.88229900 | -0.29977100 |
| C | 3.56755400  | -1.98664700 | -0.15208300 |
| C | 2.19438700  | -1.82096100 | -0.09650100 |
| C | 1.61964200  | -0.54925100 | -0.21906000 |
| C | 2.46688400  | 0.54888300  | -0.39767200 |
| C | 3.84509800  | 0.38808300  | -0.42857600 |
| O | 6.29504900  | -2.18906600 | -0.81969900 |
| C | -5.35166400 | -3.13773600 | 1.20835500  |
| C | -6.54620800 | -3.23701800 | 0.50238600  |
| C | -6.90721500 | -2.21803700 | -0.37310400 |
| C | -6.08241100 | -1.11544500 | -0.55138900 |
| C | -4.88624200 | -1.01228900 | 0.16317400  |
| C | -4.52871100 | -2.03075400 | 1.05031300  |
| N | -4.04779900 | 0.11785100  | -0.00702900 |
| C | -2.64739800 | -0.04256000 | -0.06321000 |
| C | -4.62247200 | 1.41009200  | -0.09377500 |
| C | -5.69763200 | 1.76009600  | 0.72702700  |
| C | -6.26513000 | 3.02365400  | 0.63087000  |
| C | -5.76182300 | 3.95855700  | -0.26766400 |
| C | -4.68668300 | 3.61256100  | -1.07987400 |
| C | -4.12357700 | 2.34579600  | -1.00381900 |
| C | -1.79617900 | 0.89762100  | 0.52663300  |
| C | -0.42166500 | 0.73441300  | 0.46431400  |
| C | 0.15124900  | -0.37340800 | -0.16768700 |
| C | -0.70861000 | -1.31097000 | -0.74843000 |
| C | -2.08368700 | -1.14856300 | -0.70813100 |
| H | 10.01443000 | 0.92584500  | -0.69962400 |
| H | 9.50304900  | 2.52939600  | 1.11734000  |
| H | 7.30684800  | 2.45186200  | 2.25465200  |
| H | 5.60675400  | 0.80141300  | 1.55251100  |
| H | 8.31061700  | -0.76396800 | -1.36906900 |
| H | 4.01497100  | -2.97020700 | -0.07438600 |
| H | 1.55464600  | -2.68109600 | 0.06358400  |
| H | 2.03869800  | 1.53394300  | -0.54260800 |
| H | 4.48203500  | 1.24996700  | -0.58894500 |
| H | -5.06226000 | -3.92078400 | 1.89908700  |

|   |             |             |             |
|---|-------------|-------------|-------------|
| H | -7.18885200 | -4.09860000 | 0.63351400  |
| H | -7.83241200 | -2.28554800 | -0.93298000 |
| H | -6.35786100 | -0.32526100 | -1.23982900 |
| H | -3.60379300 | -1.94732500 | 1.60863700  |
| H | -6.08354200 | 1.03448800  | 1.43319200  |
| H | -7.09911200 | 3.28147600  | 1.27277300  |
| H | -6.20295000 | 4.94515100  | -0.33501100 |
| H | -4.28973200 | 4.32853800  | -1.78972400 |
| H | -3.29386900 | 2.07181700  | -1.64470600 |
| H | -2.22176000 | 1.75076600  | 1.04103800  |
| H | 0.21888500  | 1.46053400  | 0.95222900  |
| H | -0.29265500 | -2.16190100 | -1.27600000 |
| H | -2.73331700 | -1.87474200 | -1.18171300 |

*p*-TPA-BP LE:

|   |             |             |             |
|---|-------------|-------------|-------------|
| C | 9.15424200  | 0.74329000  | -0.11717800 |
| C | 8.17470900  | -0.15959900 | -0.50239500 |
| C | 6.87617700  | -0.06606100 | 0.02824500  |
| C | 6.59796300  | 0.93889600  | 0.97128800  |
| C | 7.58450900  | 1.84013100  | 1.33744300  |
| C | 8.86565400  | 1.75190400  | 0.79626000  |
| H | 10.14905200 | 0.66153000  | -0.53876400 |
| H | 8.39954600  | -0.93133600 | -1.22780800 |
| H | 5.61978400  | 0.98899100  | 1.43241800  |
| H | 7.35586100  | 2.60909800  | 2.06592500  |
| H | 9.63163300  | 2.45842200  | 1.09066400  |
| C | 5.85826900  | -1.03616400 | -0.36587800 |
| O | 6.26433500  | -2.17548800 | -0.82677700 |
| C | 4.40845100  | -0.84966600 | -0.30554000 |
| C | 3.56165600  | -1.96502100 | -0.18732700 |
| C | 3.82734500  | 0.42502800  | -0.42097600 |
| C | 2.18769800  | -1.80262300 | -0.14847000 |
| H | 3.99343700  | -2.95343100 | -0.09244300 |
| C | 2.45343600  | 0.57198300  | -0.36917800 |
| H | 4.45664100  | 1.29088500  | -0.58404800 |
| C | 1.60282500  | -0.53406500 | -0.22926300 |
| H | 1.55556500  | -2.67317600 | -0.01572300 |
| H | 2.02427300  | 1.56102200  | -0.48420200 |
| C | 0.13650100  | -0.36341300 | -0.17516800 |
| C | -0.72335000 | -1.29649000 | -0.76546900 |
| C | -0.44078600 | 0.73587800  | 0.46966100  |
| C | -2.09863900 | -1.13920600 | -0.72045400 |
| H | -0.30640000 | -2.13942700 | -1.30490400 |
| C | -1.81562800 | 0.89502500  | 0.53409300  |

|   |             |             |             |
|---|-------------|-------------|-------------|
| H | 0.19723400  | 1.45775700  | 0.96699400  |
| C | -2.66477600 | -0.04148500 | -0.06380200 |
| H | -2.74716800 | -1.86221100 | -1.20057900 |
| H | -2.24327000 | 1.74177800  | 1.05746200  |
| N | -4.06648400 | 0.11417600  | -0.00447100 |
| C | -4.89882500 | -1.01884900 | 0.17165400  |
| C | -4.52912700 | -2.03749100 | 1.05385800  |
| C | -6.10066700 | -1.12694100 | -0.53306100 |
| C | -5.34572500 | -3.14836300 | 1.21722700  |
| H | -3.59976600 | -1.95084400 | 1.60420100  |
| C | -6.91870100 | -2.23360300 | -0.34951200 |
| H | -6.38563800 | -0.33738700 | -1.21830500 |
| C | -6.54582400 | -3.25226600 | 0.52142900  |
| H | -5.04673300 | -3.93105000 | 1.90429900  |
| H | -7.84815700 | -2.30457700 | -0.90188700 |
| H | -7.18339400 | -4.11697000 | 0.65669700  |
| C | -4.64454000 | 1.40419800  | -0.09349500 |
| C | -5.72394700 | 1.75203000  | 0.72301100  |
| C | -4.14362000 | 2.34183800  | -1.00069900 |
| C | -6.29363300 | 3.01438900  | 0.62489400  |
| H | -6.11117400 | 1.02578700  | 1.42776000  |
| C | -4.70923800 | 3.60730200  | -1.07868900 |
| H | -3.31019200 | 2.07023900  | -1.63771100 |
| C | -5.78869500 | 3.95082000  | -0.27115600 |
| H | -7.13067700 | 3.27018800  | 1.26364400  |
| H | -4.31047200 | 4.32444500  | -1.78636000 |
| H | -6.23157200 | 4.93652900  | -0.33992900 |

*p*-TPA-BP CT:

|   |             |             |             |
|---|-------------|-------------|-------------|
| C | 9.00981600  | 1.01485700  | -0.00908400 |
| C | 8.77469700  | 1.55268400  | 1.25365300  |
| C | 7.58455000  | 1.27234100  | 1.91565600  |
| C | 6.62075000  | 0.47461300  | 1.30874000  |
| C | 6.84517100  | -0.05548900 | 0.03697300  |
| C | 8.05585600  | 0.20370000  | -0.60724600 |
| C | 5.87414700  | -0.98540500 | -0.63284900 |
| C | 4.43376900  | -0.76933900 | -0.50030200 |
| C | 3.55730200  | -1.82968700 | -0.88356000 |
| C | 2.20663800  | -1.69708800 | -0.81269600 |
| C | 1.57949600  | -0.46951100 | -0.36572500 |
| C | 2.48776900  | 0.61256000  | -0.04269300 |
| C | 3.84106300  | 0.46610200  | -0.10796800 |
| O | 6.30742500  | -1.91934200 | -1.30030500 |
| C | -5.28733700 | -3.08699300 | 1.45991200  |



|   |             |             |             |
|---|-------------|-------------|-------------|
| C | -6.48829400 | -3.24105900 | 0.77468400  |
| C | -6.87741500 | -2.28133400 | -0.15569300 |
| C | -6.07362900 | -1.17883300 | -0.40739100 |
| C | -4.86950200 | -1.02547400 | 0.28433500  |
| C | -4.47978500 | -1.98265100 | 1.22427200  |
| N | -4.04250800 | 0.10135100  | 0.03323400  |
| C | -2.66669200 | -0.04064500 | -0.06011700 |
| C | -4.64762400 | 1.37686700  | -0.12090000 |
| C | -5.68941400 | 1.76527600  | 0.72503800  |
| C | -6.27628600 | 3.01257800  | 0.56770600  |
| C | -5.82824900 | 3.88382600  | -0.42125700 |
| C | -4.78893800 | 3.49515300  | -1.26045700 |
| C | -4.20094700 | 2.24559700  | -1.11947100 |
| C | -1.78887700 | 1.00580500  | 0.35509500  |
| C | -0.44008400 | 0.87028600  | 0.26318800  |
| C | 0.18799800  | -0.33051200 | -0.26297500 |
| C | -0.73423900 | -1.37698100 | -0.67145300 |
| C | -2.08210600 | -1.23848200 | -0.57360000 |
| H | 9.94156100  | 1.22238700  | -0.52172700 |
| H | 9.52238900  | 2.17998800  | 1.72450000  |
| H | 7.40871400  | 1.66928900  | 2.90840100  |
| H | 5.70217400  | 0.24079200  | 1.83492500  |
| H | 8.23096100  | -0.24907200 | -1.57574000 |
| H | 4.01011000  | -2.75216200 | -1.22439400 |
| H | 1.59419700  | -2.54353500 | -1.09023900 |
| H | 2.09303700  | 1.58102600  | 0.23077300  |
| H | 4.47613600  | 1.31610200  | 0.10848800  |
| H | -4.98045900 | -3.82409800 | 2.19191900  |
| H | -7.11717600 | -4.10178700 | 0.96461100  |
| H | -7.80825000 | -2.39639100 | -0.69760800 |
| H | -6.36672500 | -0.43388100 | -1.13750000 |
| H | -3.54933700 | -1.84875800 | 1.76324900  |
| H | -6.02736500 | 1.08689500  | 1.49931500  |
| H | -7.08130300 | 3.30945500  | 1.22889500  |
| H | -6.28700700 | 4.85771300  | -0.53750600 |
| H | -4.43975900 | 4.16277000  | -2.03871500 |
| H | -3.40001800 | 1.93009200  | -1.77757300 |
| H | -2.21445300 | 1.90775500  | 0.77837200  |
| H | 0.17572900  | 1.67719300  | 0.63207700  |
| H | -0.34895500 | -2.29003600 | -1.10070500 |
| H | -2.73368100 | -2.03304400 | -0.91690000 |
